# Supplementary material for: HPV self-sampling implementation strategies to engage under screened communities in cervical cancer screening: a scoping review to inform screening programs
Source: Front Public Health. 2024 Aug 27;12:1430968. doi: 10.3389/fpubh.2024.1430968 (PMC11384595; doi:10.3389/fpubh.2024.1430968)
Supplement: Supplementary file 3 [file Table_3.xlsx]

## Sheet: All Studies
`	Title	Authors	Year	Country	Study Design	Methods	Objectives / Intended Outcomes	Priority Population	Sample Size (n=?)	Population details (age, location, group, inclusion criteria etc.)	Participant recruitment / identification	Intervention (physician provided/mail-in/etc.) + study arms (n=?)	Comparator	Outcome: Uptake/Rates	Outcome: Barriers	Outcome: Facilitators	Outcome: Knowledge / Attitudes	Sources of Bias (limitations, etc.)	Recommendations / Next Steps	Other considerations
Caitlin	Human Papillomavirus (HPV) Self-Sampling among Never-and Under-Screened Indigenous Maori, Pacific and Asian Women in Aotearoa New Zealand: A Feasibility Study	Bromhead et al.	2021	New Zealand	Qualitative	This single-arm feasibility and acceptability study. This feasibility study explored key elements of the HPV self-sampling process in never- and under-screened Māori, Pacific and Asian women: (1) co-creating the HPV self-sampling materials; (2) contacting and inviting eligible women to participate; (3) collecting survey data to understand the women’s experience of the existing screening process a…	To trial novel wrap-around, culturally safe HPV self-sampling and follow-up processes for never- or under-screened wahine Maori, Pacific and Asian women. The study was also designed to optimise women’s experience of HPV self-sampling via a series of focus groups, including knowledge and acceptability questionnaires. While using a co-design and health literacy approach, our study aimed to evaluate…	Indigenous	84	never- and under-screened (≥5 years overdue) 30–69-year-old women from general practices in Auckland, Aotearoa	A Maori cervical screening specialist nurse was appointed to work with participating ¯ practices to invite eligible women to attend a clinic and “do a new self-sample for cervical screening”. If women could not be reached initially, a total of five contact attempts were made, including phone calls at different times/days, texts and in some cases, a letter. Women who could be contacted and who agr…	Women who agreed to participate attended a clinic for a 30 min consultation with the study nurse. In a private space, the research nurse explained kanohi ki te kanohi (face-to-face) the study and discussed the participant information sheet and consent form and answered any questions. Women were offered the knowledge questionnaire, then the research nurse explained how to take the self-sample usin…	N/A	out of 366 eligible women identified, 84 collected self samples	There was a negative response to anatomically explicit pictures in the sampling instructions.	Having a study nurse who was also wāhine Māori working with them was conducive to culturally competent care and enhanced the acceptability of HPV-SS. Tautoko, or the support they received, was important for all the women spoken to. The study nurse helped the women make decisions they were comfortable with, and for many, this was integral to their decision to do the self-sample. Almost all of the …	no respondents said they would prefer a nurse/doctor to take a usual smear test—all preferred self-sampling either at home (33/58) or a GP clinic (25/58). None responded that they did not intend to screen (either by smear or self-sample) again. The most popular preference for receiving a self-sample kit was for it to be posted (25/60), followed by picking it up from the GP clinic (17/60), while t…		we adapted several of the patient materials originally used in the Australian iPap study (exploring the acceptability of self-sampling in Australian urban and rural women who were non-respondents to the regular screening programme, aged 30–69) for an Aotearoa context. This included changes appropriate to the health literacy demands placed on women and cultural appropriateness. It also included ke…	We found the best uptake of self-sampling was at focus groups.
Caitlin	Acceptability of human papillomavirus self-sampling for cervical-cancer screening in under-screened Maori and Pasifika women: a pilot study	Brewer et al.	2019	New Zealand	Qualitative	Participants were asked to: 1) examine three different self-sampling devices; 2) complete a questionnaire; and 3) take a self-sample with at least one device (of their choice).	This pilot study aimed to: 1) examine the acceptability of self-sampling among un- and under-screened Māori, Pacific, and Asian women; 2) enquire about the level of comprehension of the instructions for self-sampling devices; 3) develop laboratory methods for processing cobas® Chlamydia trachomatis/Neisseria gonorrhoeae (CT/NG) swabs, Herswab™ and the Delphi Screener™ through the cobas 4800 HPV t…	Indigenous	56	Women aged 30–69 years who had ever been sexually active and who had not had a hysterectomy, Maori and Pacifika women	Eligible women were identified by Porirua Union and Community Health Service (PUCHS). Initially, recruitment was through mail, but this was replaced by recruitment through PUCHS nurses’ community outreach and home visits, a presentation at a community health promotion meeting, and at the regular screening clinics. Any woman who attended a screening clinic and was interested in and eligible for th…	The questionnaire was completed face-to-face followed by self-sampling and cytology at the clinic. Participants were given a package that included a brochure on cervical cancer and HPV infections, and three self-sampling devices, with written and illustrated instructions from the device manufacturers. The three self-sampling devices were: i) HerSwab (Eve Medical), ii) Delphi Screener (Rovers Medi…	Comparison of 3 SS kits	Before trying any devices, 78.0% (n=39/50) of women said that they would prefer to self-sample next time they were due for screening, and 22.0% (11/50) said that they would prefer a physician-collected sample (PCS; six women did not answer the question). After trying a device, fewer women (65.9%; n=29/44) preferred to self-sample next time, fewer women (7/44) preferred a PCS, and 8/44 expressed n…	N/A	The study found that 42% (n=22/52, four women did not answer the question) of women would prefer to receive the self-sampling kit through the post, but most (58%; 30/52) would prefer to collect the kit from a clinic.	N/A	The limitations of the study include the small sample size, which limits the reliability and generalisability of the findings. The number of women who were told about the study and invited to participate was unfortunately not recorded due to the large workload of the PUCHS nurses. The participants also included women who were younger than the target age range, and who were not of the target ethni…	N/A	Slightly more of the women who preferred to receive the kit through the post were aged <40 years (55%; n=12/22), whereas slightly more of the women who preferred to collect the kit from a clinic were aged ≥40 years (55%; 16/29).
Caitlin	Acceptability of human papillomavirus (HPV) self-sampling among never- and under-screened Indigenous and other minority women: a randomised three-arm community trial in Aotearoa New Zealand	Brewer et al.	2021	New Zealand	Quantitative	Three arm randomized trial conducted and follow-up statistical analysis of participation rates for each type of HPV screening.	We aimed to evaluate whether two specific invitation methods for self-sampling could increase screening participation. We also sought to obtain information on the resources required to achieve 90% follow-up of hrHPV-positive women. Our study is the first to evaluate the effectiveness of a mailed self-sampling kit for cervical-cancer screening in Aotearoa New Zealand.	Indigenous	3553	never- and markedly under-screened (≥5 years overdue) 30-69-year-old Maori, ¯ Pacific, and Asian women.	Participating clinics were selected because they had enrolled populations with high proportions of Maori, ¯ Pacific, and Asian women who were never- or under-screened. Clinics were also selected to represent a range of small and large clinicsRandomisation was undertaken as follows: the clinics sent a list of women who had been identified as being eligible for the study to the study programmer who…	Arm 1: clinic-based self-sampling, in which women were invited to take a self-sample at their usual general practice (GP); Arm 2: home-based self-sampling, in which women were mailed a kit and invited to take a self-sample at home	Arm 3: Usual care in which women were offered standard cytology (at a clinic, at an independent service provider, or with the study nurse).	Sending women a self-sample kit for hrHPV testing at home resulted in statistically significantly (p≤0.001) higher participation than an invitation to have a usual-care cytology sample in the clinic among Maori ¯ (14.6% vs. 2.0%) and Asian (18.5% vs. 4.5%) and, to a lesser extent, among Pacific women (8.8% vs. 1.7%). In the fully adjusted models, Maori ¯ women randomised to the homebased group we…	An invitation to take a self-sample at a clinic was less effective, suggesting that at least some of the barriers to clinic attendance are the same whether for self-sampling or a healthcareprofessional-taken sample. Known opportunity costs and barriers to clinic attendance for cervical screening may explain why a higher proportion of home-based women participated	N/A	N/A	The limitations of our study include the inability to ascertain whether we had the correct address or phone number for all women who appeared to be non-responders, a known limitation of population-recruitment approaches. Participation may therefore be underestimated. We invited women only in the Auckland and Waitemata¯ DHB areas, so our findings may not be generalisable to women outside of those …	N/A	Based on feedback from the participating clinics, it may be that our participation is an underestimate of potential uptake if selfsampling were to be integrated into the NCSP because, in the setting of the study, there was a need to provide a large amount of trial-specific information; reading all this may have been a barrier, particularly for women for whom English is a second language and those…
Caitlin	HPV Self-Sampling for Cervical Cancer Screening Among Ethnic Minority Women in South Florida: a Randomized Trial	Carrasqiullo et al.	2018	USA	Mixed Methods	A 26-week single-blind randomized pragmatic clinical trial. Participants were randomized into three groups: (1) outreach by CHWs and provision of culturally tailored cervical cancer screening information (outreach), (2) individualized CHW-led education and navigation to local health care facilities for Pap smear (navigation), or (3) individualized CHW-led education with a choice of HPV self-sampl…	To compare a community health worker (CHW)-led HPV self-sampling intervention with standard cervical cancer screening approaches.	Newcomer	625	Miami women who (1) self-identified as Hispanic, Black, or Haitian, (2) age 30–65 years, and (3) did not have a Pap smear within the past 3 years.	CHWs employed by community health centers (CHCs) in each neighborhood recruited potential participants at community venues (e.g., stores, community events, churches). They explained the study and assessed study eligibility. Detailed contact information was obtained from eligible women expressing interest in participating. CHWs provided this information to research assistants (RAs), who contacted …	Outreach Group During the study intake visit, all participants were provided a culturally tailored brochure in their preferred language (English, Spanish, or Haitian Creole). The brochure explained the importance of cervical cancer screening and community-specific information on how to obtain a Pap smear at the CHC or other local facilities offering free or low-cost Pap smears. These brochures we…	Comparison of 3 intervention groups	In total, there were 265 women in the study who completed HPV self-sampling. This included the 133 of 207 (64%) of women in the self-swab group who chose to have the HPV self-sampling. In addition, at study conclusion, there were 174 women in the outreach and navigation groups who reported not being screened. After their exit interview, we offered these women the opportunity to have HPV self-samp…	for women who were not income-eligible for free Pap smears, even nominal co-payments may be a differential barrier to screening.	We found that nearly a third of women in the outreach alone group were screened, suggesting tailored public health outreach by itself can have an important impact. However, this finding should be interpreted with caution as we relied on self-reports which may have led to over-reporting	We also found that women in the self-swab option group had greater increases in cervical cancer knowledge than women in either the navigation or the outreach group. This finding is particularly interesting because women in the self-swab option group received the same education as women in the navigation group. We believe that perhaps providing women a more active role in the screening process wit…	while our results demonstrated HPV self-sampling to be an efficacious cervical cancer screening strategy, we acknowledge that this finding may not apply to all groups of underserved and ethnic minority women. Our sample size was small, and the majority of our sample included Hispanic and Haitian immigrant women who were recruited from public areas.
Caitlin	Assessing the acceptability of self-sampling for HPV among Haitian immigrant women: CBPR in action	Barbee et al.	2010	USA	Qualitative	Recruited 246 eligible women to this study. Participants provided self-collected cervical specimens for HPV testing and answered a series of questions about their experience with self-sampling for HPV.	To determine whether pairing self-sampling for HPV with community health workers (CHWs) is a culturally acceptable method for cervical cancer screening among Haitian immigrant women.	Newcomer	246	21 years of age and older; no prior history of cervical cancer or surgical hysterectomy; no recent Pap smear	The CHWs recruited women primarily through the extensive network of the community-based organization (CBO) where they were formally employed and by canvassing community venues across Little Haiti, including flea markets, health clinics, and Laundromats, to identify women meeting study eligibility criteria. The CHWs approached all women in such venues who appeared to be of Haitian descent and 21 y…	Interviews and self-sampling took place wherever the participant felt most comfortable, usually at her home or the home of a close friend, and were conducted in English or Haitian Kreyol, according to the participant's preference. The CHWs spent an average of one hour with each participant. As previously mentioned, they first explained the study goals to participants and obtained informed consent…	N/A	N/A	women were concerned that they were not sampling from the right place and expressed that they had more confidence in their doctor's ability than their own to get adequate samples for cytology and HPV testing.	When paired with CHWs, who are of Haitian descent and well respected in Little Haiti, selfsampling is a highly acceptable method of cervical screening for Haitian women in this ethnic enclave. The CHWs were trained to participate in research and data collection methods using a standardized manual, created by one of the academic partners, that provides didactic instruction on the logistics of part…	The vast majority of women (97.6%) was comfortable using the self-sampler at home, would recommend this screening method to their friends and/or family members (98.4%), and described the sampler as easy to use (95.1%). Additionally, 97% of all self-collected specimens were deemed adequate for HPV testing.	The questionnaire was short to avoid over-burdening women.	Pairing CHWs with a reliable self-sampling method for cervical screening circumvents critical access barriers in Little Haiti and may also be more congruent with Haitian women's cultural beliefs about gynecological health. While these findings are not generalizable to other immigrant groups in the US, or even Haitian women outside Little Haiti, they are useful for other investigators, similarly c…	Culturally similar CHWs provide value in reaching this immigrant population.
Caitlin	Acceptability and feasibility of HPV self-sampling for cervical cancer screening among patients and providers in two safety-net institutions in Miami	Ilangovan et al.	2016	USA	Mixed Methods	Haitian and Latina women aged 30–65 years with no Pap smear in the past 3 years were recruited. Women were offered HPV self-sampling or traditional Pap smear screening. The acceptability of HPV self-sampling among patients and clinic staff was assessed. If traditional screening was preferred the medical record was reviewed.	To assess the feasibility and acceptability of HPV self-sampling among patients and clinic staff in two such settings.	Newcomer	180	30-65 years, in Miami, Female patients were eligible if they were aged 30–65 years, had not had a Pap smear in the prior 3 years, were not pregnant, were not actively menstruating, and had not had their uterus removed.	Participants were recruited by convenience sampling from the waiting room of the above two clinics. Recruitment took place between May 2013 and February 2014. Two community health workers (CHWs) recruited participants. The CHW assigned to the ACC was Hispanic and the other at CHS was Haitian. At ACC our CHW was instructed to only recruit Latina patients and at CHS only Haitian patients. At both s…	Participants then received a short information session on cervical cancer screening using a flipchart. The flipchart described normal female anatomy, provided information about cervical cancer progression and risk factors. Women then received information about the traditional Pap smear as a means to screen for cervical cancer and an explanation of HPV self-sampling as an alternative means of scre…	Pap Test. If HPV self-sampling was not chosen, the participant was encouraged to discuss the need for cervical cancer screening with her provider during the visit. Detailed contact information was also obtained from these women. Five months after the visits, the medical records were examined to determine whether they had a Pap smear performed at their clinical site.	67% of women offered SS accepted it and all who accepted followed through with screening.	N/A	Cultural sensitivity, patient communication, and motivational interviewing techniques are all important features of CHW training programs and likely contributed to the high uptake.	99% of those who completed SS considered it to be an acceptable method.	Did not examine acceptability among women having a Pap smear and thus there is no control group to directly compare acceptability of HPV self-sampling versus Pap smear	Additional work should explore whether strategies such as providing self-sampling devices through the mail, as has been shown in other countries, can also improve participation in cervical cancer screening in the United States
Caitlin	A randomized trial of self-sampling for human papilloma virus among minority immigrant women in need of cervical cancer screening	Kobetz et al.	2018	USA	Multi-Methods	1. A randomized trial to compare the effectiveness two modes of self-sampling delivery - SS +Mail (selfsampling delivered via US mail) versus IP+SS (self-sampling delivered in-person) – for increasing cervical cancer screening uptake among ethnic minority and immigrant women in South Florida 2. Approximately 6 months-post study enrollment, participants were scheduled for a follow-up visit with th…	1. Our primary outcome was self-sampling completion within 6 months of enrollment 2. Secondary outcomes included changes in; 1) cervical cancer knowledge (defined as the proportion of participants answering at least 3 of 5 items about cervical cancer signs and risk factors correctly) 2) the proportion of participants reporting having health insurance; and 3) the proportion of participants reporti…	Newcomer	600 (split between the two groups)	The sample included women who self-identified as Hispanic, Haitian, or non-Hispanic Black, were 30–65 years of age, and reported not having had a Pap smear in the previous 3 years.	Community health workers, who were indigenous to the three target neighborhoods and knowledgeable of cultural mores related to health promotion, recruited and screened women for eligibility at a variety of community venues including churches, flea markets, and community events, such as health fairs. Eligible and interested women were then scheduled for a one-on-one meeting with a community health…	1. IP+SS—Women randomized to this arm received a 30-minute in-person study visit by a CHW at a mutually-determined community location. During this visit, the CHW provided brief health education about the importance of cervical cancer screening as well as verbal and visual instructions for how to appropriately self-sample, using the POI/NIH self-sampler... Participants then were provided the optio…	In-person education / kit hand-out OR via the mail	- Six-month follow-up was greater than 70% in both study arms (70.7% in IP+SS, and 71.2% in SS +Mail) and did not significantly differ between study arms. -Completion of HPV self-sampling was high in both study arms, reaching 81.0% (n = 243) among IP+SS participants and 71.6% (n = 214) among SS+Mail participants	- CHEs noted that some women in Little Haiti and South Dade were uncomfortable going to the post office to mail their samples, as this is a government-run facility and there were concerns with immigration status.	- Our high success rate may be attributable to our intervention having been delivered by CHWs, who are members of our target communities and knowledgeable regarding cultural norms. - Within our mailed self-sampling arm, CHWs provided culturally-tailored health education by phone, potentially enhancing HPV self-sampling completion.	Among participants in the SS+Mail arm, cervical cancer knowledge significantly increased from 39.0% of participants answering at least 50% of the questions correctly at baseline to 47.9% at 6-month follow-up. Change in cervical cancer knowledge was not significant among participants in the IP+SS arm. T	- Firstly, we utilized one CHW per community to deliver each intervention to community members. Thus, variation in intervention outcomes between communities may have been due, in part, to variation in intervention delivery between our CHWs. To minimize any potential differences and ensure intervention fidelity, CHWs received extensive training, including formal CHW certification, and underwent mo…	- future research should examine whether mailed HPV self-sampling is a viable screening strategy in other groups that experience cervical cancer disparities. - Future studies should examine not only self-sampling completion but also adherence to follow-up care to further evaluate the effectiveness of this screening intervention	- All study procedures were conducted in the participants’ language of preference, either English, Spanish, or Haitian Creole - Of note, within the IP+SS arm, 42 (14%) women elected to mail their specimens in rather than collect the sample the day of the in-person study visit with the CHW. Most often, these women were menstruating on the day of the in-person study visit and thus elected to self-s…
Caitlin	Community-Based Screening for Cervical Cancer: A Feasibility Study of Rural Appalachian Women	Crosby et al.	2015	USA	Mixed Methods	400 women were recruited from eight rural Appalachian counties, in 2013 and 2014. After completing a survey, women were provided instructions for self-collecting a cervico-vaginal swab. Specimens were tested for 13 oncogenic HPV types. Simultaneously, women were notified of their test results and offered initial navigation for Pap testing. Chart-verified Pap testing within the next six months ser…	To describe women’s comfort levels and perceptions about their experience self-collecting cervico-vaginal swabs for HPV testing; to determine whether nurse-guided patient navigation increases the odds of women receiving a traditional Pap test after HPV screening; and to test the hypothesis that women testing positive for oncogenic HPV would be more likely to have a subsequent Pap test than those …	Rural/Remote	400	Average age of the sample was 40.2 years. 1) being between 30–65 years of age, 2) reporting not having a Pap test in the past three years, and 3) reporting not currently being pregnant, 4) reporting never testing positive for HPV, 5) reporting sexual activity in the past 12 months.	Recruitment occurred in eight economically distressed counties (as designated by the Appalachian Regional Commission) of rural Appalachian Kentucky. Recruitment flyers were posted in all seven of the regionalized local health departments comprising the district. Women were also recruited personally at community outreach events and non-traditional healthcare settings (e.g., mental health and subst…	a research assistant read aloud a specimen collection instruction sheet, before providing a hard copy to each woman. Women took the instructions into a public or private restroom (depending upon recruitment venue). After self-collecting, women then swirled the collection brush 40 times in a specimen vial containing Preservecyt®, a fixing solution. They then sealed the specimen vial, placed it in …	N/A	Because the consent process included the point that women would be asked to self-collect a cervico-vaginal swab, the study was not designed to describe or quantify the refusal to self-collect.	About 18% (18.5) reported experiencing some pain during the collection process, and 10.5% reported bleeding during the collection process.	Comfort levels with self-collection were high: 89.2% indicated they would be more likely to self-collect a specimen for testing, on a regular basis, compared to Pap testing. Thirty women (7.5%) had a follow-up Pap test.	With some exceptions, women were physically comfortable with the process for self-collecting cervico-vaginal swabs for HPV testing and 89% preferred this method of screening over traditional, clinic-based Pap testing.	Findings are limited by the use of a convenience sample. Also, the study design could not determine whether motivational issues or access issues operated to preclude Pap testing. For instance, women may have been motivated to have a Pap test as a consequence of being tested for HPV, but they may have perceived a lack of access to these services (despite our navigation attempts). In addition, our …	Further, efforts to re-contact women who have received an oncogenic HPV test result and an initial navigation contact may not be useful. Finally, testing positive for oncogenic HPV may not be a motivational factor for subsequent Pap testing.	in responding to a question asking for level of agreement regarding whether women would have a Pap test or colposcopy “if my HPV test is positive”, 55.9% selected the response option of “strongly agree”, with 26.6% selecting “agree,” 8.5% selecting “slightly agree,” and the remainder selecting a level of disagreement.
Caitlin	Self-collected vaginal swabs for HPV screening: An exploratory study of rural Black Mississippi women	Crosby et al.	2017	USA	Mixed Methods	Eighty-eight women were recruited from two churches located in different towns of the Mississippi Delta. After completing a survey, women were provided instructions for self-collecting a cervico-vaginal swab and completing a post-collection survey. Specimens were tested for 13 oncogenic HPV types.	To determine the post-procedure acceptability of self-collecting a vaginal swab for HPV testing among a highly impoverished and geographically isolated population of medically underserved Black women residing in the Mississippi Delta. Further, to test correlates of reporting that self-collection is preferred over Pap testing. Finally, to determine the prevalence of any of 13 high-risk HPV types a…	Rural/Remote	88	1) being 30–65 years old, 2) not having a Pap test in the past three years, 3) not currently pregnant, 4) never testing HPV-positive, and 5) sexual activity in the past 12 months. Average age 46.5 years.	Two churches located in different towns of the Mississippi Delta served as recruitment sites. Two female research assistants obtained permission and support from church ministers to recruit women after Sunday services. As opposed to the research assistants approaching women, women were told to find and talk with the research assistant after services to learn about the study. Because print informa…	Research assistant read aloud a specimen collection instruction sheet, before providing a hard copy. Women took the instructions into church restrooms. The instructions included an illustration showing the insertion of the swab into the vagina and the rotating motion of the swab to collect an adequate specimen. After self-collecting, women then swirled the collection brush 40 times in a specimen …	N/A	Because the consent process included the point that women would be asked to self-collect a cervico-vaginal swab, the study was not designed to describe or quantify the refusal to self-collect.	17% reporting some pain during self-collection were less likely to express this preference was not surprising, but it does suggest that practice-based programs using self-collection should provide instructions to women such that any pain in self-collection is minimal		When asked “how comfortable were you with collecting the specimen,” 35.2% selected the option of “comfortable,” 19.3% selected “somewhat comfortable,” 22.7% selected “slightly comfortable,” 13.0% selected “neither comfortable nor uncomfortable,” and 8.0% selected “uncomfortable.” Seventeen percent reported experiencing some pain during the collection process, and 12.5% reported bleeding during th…	1) Findings are limited by the use of a convenience sample and by the validity of the self-reported data. 2) limited by the very small sample size and the corresponding lack of statistical power. 3) the compensation provided to women for completing the assessment may have motivated them to agree to self-collection thus whether similar results would occur in the absence of this compensation is not…	That women self-collected in their church is an important finding in this regard as it suggests that such programs could be faith-based. Black rural women from the Deep South are generally comfortable self-collecting cervico-vaginal swabs for HPV testing. Given that nearly 30% tested positive for oncogenic HPV, the utility of this screening method appears feasible and practical. Future studies sh…	it is noteworthy that the percent relative difference in mean scores for the scale measure of trust in doctors was 11.5, indicating that women lacking this trust are potentially more likely to prefer self-collection over Pap testing. That women with recent multiple male sex partners were less likely to express this preference may be a consequence of their greater presumed risk and thus their sens…
Caitlin	Self-collected cervicovaginal sampling for site-of-care primary HPV-based cervical cancer screening: a pilot study in a rural underserved Greek population	Chatzistamitou et al.	2017	Greece	Mixed Methods	women provided self-collected cervicovaginal sample along with a study questionnaire	To test the feasibility of asite-of-care cervicovaginal self-sampling methodology forHPV-based screening in an underserved rural female Greek population.	Rural/Remote	346	women residing rural areas of Northern Greece	women residing rural areas of Northern Greece were invited, via a public announcement from the local authorities,to visit local primary health care units at a particular date,where midwives provided information on benefits ofself-sampling for cervical cancer screening and the studyrationale. All women who attended the meeting agreed toparticipate in the study (participation rate: 100%)	100% (n=346) of woen agreed to participate. They received a self-sampling kit along with the necessary instructions provided by the manufacturer. Atthat time and place, they privately collected the specimen–alone or with midwife supervision–and then gave it to thehealthcare professional. Following that, the participant filled-in a questionnaire specifically designed in order to allow con-clusions…	N/A	All recruited women participated in screening (100%, n=346)	When analysing women’s attitude (reasons for not previ-ously attending cervical cancer screening,Table 2) in relationto self-sampling (self-sampling acceptance,Table 4) we foundthe following: The majority of women (214/346, 61.8%), whoreported negligence as the reason for not being tested, char-acterised self-sampling as comfortable (chi-squared 10.016,p¼.040) and would rather prefer self-samplin…	Most women reported non-difficulty and non-discomfort in self-sampling (77.6% and 82.4%, respectively). Women of the younger age group (<44 years) describedself-sampling as ‘very easy’.	When asked about the experience of the self-samplingmethod and their acceptance, women preferred by far self-sampling to the clinician-aided method and reported thatshould self-sampling being available, they would test them-selves more regularly	a limitation and possible source of bias would bethe high dropout rate (22%) of women requiring colposcopy,due to various reasons. Since the present pilot study, though,is not a diagnostic accuracy study this would not affect theobjectives, i.e. the feasibility and acceptance of the overallprocess.
Caitlin	Implementation of HPV-based Cervical Cancer Screening Combined with Self-sampling Using a Midwifery Network Across Rural Greece: The GRECOSELF Study	Agorastos et al.	2019	Greece	Quantitative	Women residing in remote areas of Greece were approached by midwives, of a nationwide network, and were provided with a self-collection kit (dry swab) for cervicovaginal sampling and asked to answer a questionnaire about their cervical cancer screening history. Samples were laboratory analyzed for hrHPV.	The main objective of the GRECOSELF study was to explore the implementation of self-sampling combined with hrHPV DNA testing in Greece, utilizing a nationwide midwifery network to approach women residing in remote rural areas of the country who consequently do not have regular access to cervical cancer screening	Rural/Remote	13111	nonpregnant women between 25 and 60 years old who resided in rural areas of Greece. The mean age was 44.4 and the majority of the recruited women were premenopausal (69.3%) and unvaccinated (97.2%) against HPV.	Eligible participants were approached by midwives through public announcement in their place of residence. In GRECOSELF, we used a network of midwives, working in public health care, who cover most of the rural areas of the country, to serve as providers for self-sampling devices. The model was a combination of a community campaign at the village level, involving local authorities, and a door-to-…	Participants were provided with a dry swab (Roche Molecular Systems) along with the necessary sampling instructions. Each participant privately collected the cervicovaginal specimen on the dry swab, either alone or under midwife supervision, mainly in a primary health care facility (Health center, General Practitioner's office) or at home; the woman inserted the swab in the vagina, and rotated it…	N/A	Overall, of the 13,111 samples tested, 267 (2.0%) yielded an invalid HPV result; therefore, 12,844 women with a valid HPV result were included in the analysis. Of these, 11,774 tested hrHPV negative and 1,070 (8.3%) women tested positive for at least one hrHPV type. A total of 148 of the 1,070 (13.8%) tested positive for HPV16 only and 41/1,070 (3.8%) for HPV18 only. A total of 773 of the 1,070 (…	N/A	Regarding Greece and according to the results presented herein the midwifery network suggested by GRECOSELF is a promising means of increasing screening coverage, given the geography of the country as well as the already established primary health care setting.	N/A	Limitations of the study are, first, the fact that, due to various reasons, not all hrHPV-positive women detected during the study accepted to undergo colposcopy; and, second, that cervical cancer screening history information was provided by the women themselves rather than documented reports, mainly due to the lack of registry infrastructure in Greece. Missing information regarding cervical can…
Caitlin	The effect of self-sampled HPV testing on participation in cervical cancer screening on a remote island	Yamasaki et al.	2019	Japan	Quantitative	Participants were mailed a self sample kit or a regular recall for screening and participation rates were analyzed across groups.	The purpose of this study was to assess the effect of HPV self-sampling devices among non-attenders.	Rural/Remote	249	non-attenders who were scheduled for participation in the cervical cancer screening program; women aged 20 and 49	2,986 non-attenders who missed the last round of cervical screening were identified with the assistance of the Goto city government. At first, we sent all of 2,986 non-attenders two kinds of letters; one is a letter to attend regular cytology screenings as the first-call, and the other is a letter requesting their written consent for participation in this study using a HPV self-sampling device.	HPV self-sampling devices were sent by mail to the n=125 non-attenders in the self-sampling group. The devices were sent along with pictorial instructions and a pre-paid return envelope. Women in the self-sampling group received letters with the results of their HPV test and scheduled appointments with a medical institution for cytology. The womenʼs gynecologists were informed about the study and…	Re-call for regular pap smear cytology screenings. The n=124 women in the “recall” group were invited by letter to attend regular cytology screenings. Cervical cytology was conducted by smear method, and all results of the cytological findings were read by the same screener at Goto City Hospital	A total of 95 of the 125 cases in the self-sampling group participated in cervical cancer screening and/or returned the self-sampling device. The overall rate of participation in cervical cancer screening and/or returning the self-sampling device was 76.00%. A total of 15 of the 124 cases in the “recall” group participated in cervical cancer screening. The overall cervical cancer screening partic…	N/A	Sending simple pictorial instructions on how to obtain the self-sampled specimen and return the self-sampling device proved sufficient for HPV testing in all 94 cases where the HPV self-sampling devices were returned, and there were no adverse events	N/A	N/A	offering HPV self-sampling devices to nonattenders may improve screening coverage and acceptability in remote areas where there is a lack of medical services. In this study, we were able to identify CIS patients among nonattenders by offering HPV self-sampling devices.	N/A
Madi	Feasibility of self-sampling and human papillomavirus testing for cervical cancer screening in First Nation women from Northwest Ontario, Canada: a pilot study	Zehbe et al.	2011	Canada	Multi-Methods	- Eligible women who wanted to participate in the pilot following an education session, contacted study staff. The research nurse provided information orally and through the informed consent form, which was explained to, and signed by, the volunteer before taking a self-sample. After taking the self sample, the questionnaire was answered, numbered and sent to the research team in a sealed envelop…	- To assess the feasibility of this alternative method we used a questionnaire in which demographics and cervical cancer knowledge, self-sampling and sexual health were investigated. - Sample adequacy and HPV testing methods were also evaluated.	Indigenous	49 (47 First Nations, 2 Metis)	- self-reported First Nation ethnicity; registered in FWFN - aged 25 to 59 years and had - a command of the English language.	- 10 communities were identified as part of one strategic region of the Anishinabek Nation inhabiting the northern shore of Lake Superior from Pigeon River to Batchawana Bay. - women were not approached individually	- A public health nurse practitioner (project nurse) served as primary contact for the participating women. To enrol approximately 50 volunteers, recruitment and info dissemination through a community meeting with an information poster; flyers posted in public places within the community; flyers sent to all community households through the weekly Band newsletter and flyers distributed at parentin…	NA	- NA as the goal of the pilot was to 1) look at positivity rates and 2) gather survey data - overall participation rates was not presented as women were not approached to participate but had to approach the study team themselves		- 87.2% (41/47) indicated willingness to participate in self-sampling screening in the future - For acceptability of self-sampling, 77.1% (37/48) found self-sampling easy, 6.3% (3/48) were mid-range, 16.7% (8/48) - The preferred way to learn about sexual health was through interaction with an HCP: 35% (47/133). This was followed by the use of audiovisual material that is, watching a DVD or lookin…	- Importantly, 87.8% (43/ 49) had knowledge ranging from “some to very good” and about half of the participants had “good or very good” knowledge about cervical cancer.	- Our participants also had easy access to the collaborating health centre in FWFN, which advocates Pap tests for First Nation women and may explain the rather high reported rate of previous Pap tests. - The situation differs for members of the other Northern Superior communities who are required to travel to larger cities like Thunder Bay for their health needs	- key question to be answered in the larger study will be how best to reach and provide sexual health education to underscreened women. - We will also ask participating women to explicitly rate their discomfort by comparing HCP sampling with self-sampling.	- Women were enrolled from age 25 rather than age 30 because Canadian First Nation women exhibit earlier onset of cervical cancer than the general population and HPV testing is recommended at an earlier age. **use community ambassadors
Madi	Community-randomised controlled trial embedded in the Anishinaabek Cervical Cancer Screening Study: human papillomavirus self-sampling versus Papanicolaou cytology	Zehbe et al.	2016	Canada	Quantitative	- We performed a two-arm, community-randomised controlled trial with 11 First Nations communities in the Thunder Bay district of Northwest Ontario, Canada.	- The primary outcomes of the trial were initial and cumulative screening uptakes as well as participant psychosocial status.	Indigenous	834 randomized into two arms (A=404, B=430)	- We identified 1002 eligible women (denominator) between 25 and 69 years old as being band members in one of the 11 participating First Nations communities and living on their own or another reserve, on Crown land or off-reserve with their main address in the Thunder Bay district	- CBRAs invited women to participate in the ACCSS trial after an educational event and other recruitment strategies (Participation recruitment included individual (eg, door-to-door visits and in-person appointments) and communal (eg, educational events, health fairs and well women clinics) strategies). - 11 communities (6 in group A and 5 in B)	- In the intervention group (arm A), women were first offered HPV testing using self-sampling and in the control group (arm B), women were first offered Pap testing. - a survey was administered that looked at ratings of comfort with the self sampling device	self sampling versus pap	- The cumulative uptake of screening was 20.6% in arm A and 16.0% in arm B (study participation was lower than what was expected) - However, rates were very different community to community (11 total)	- Qual results were presented in a separate paper	- Qual results were presented in a separate paper	- Qual results were presented in a separate paper	Did not present this	Did not present this	- During an All Chiefs’ meeting in Thunder Bay, the study lead was invited to present the proposed pilot where the chiefs then decided to participate in the pilot **use community ambassadors
Madi	Reaching under-screened/never-screened indigenous peoples with human papilloma virus self-testing: A community-based cluster randomised controlled trial	MacDonald et al.	2021	New Zealand	Quantitative	- He Tapu Te Whare Tangata is a community-based cluster randomised trial (cRCT) which offered HPV self-testing (intervention) to under-screened/never-screened women and compared uptake of screening with the uptake of usual care – a cervical smear (control).	- The aim of the present study was to increase cervical screening coverage for under-screened/ never-screened Māori women by offering HPV self-testing	Indigenous	500 Maori in intervention arm, 341 in control arm	- Maori women in the far north, many living rurally - Inclusion criteria were women, 25 to 69 years, who had not had a cervical smear for ≥4 years and were registered with one of the study clinics.	Eligible women were identified through patient management systems (PMS) in each clinic forming the clinic cohort for screening in each arm	- The clinic groups (3 clinics were chosen to reach the intended sample size) were then randomised to either treatment or control arms on the roll of a die, performed by a Declarations Officer of the NZ Police Force. - Staff in control and intervention clinics were given an educational update on HPV - Clinics were encouraged to use their usual methods to invite women to cervical screening includi…	Pap	- 500 eligible Māori women in the intervention arm, 295 (59.0%) were screened with an HPV self-test or/ and smear. 73.6% in intervention opted for self sampling and 13.9% chose the pap test. - Of 254 Māori women who accepted an HPV self-test, 230 (90.6%) took their own swab, 21 (8.3%) were taken by a clinician, usually a nurse, three were not stated; 187 (73.6%) were taken at the clinic, 57 (22.4…	NA	NA	NA	- control and intervention groups had differential characteristics hence the analysis was corrected to take into account these variables.	- These findings may be generalisable to other under-screened/ never-screened Indigenous populations in Canada, NZ, Australia and the USA. - This study was run in the community by primary care clinicians, not researchers. Both arms had active cervical screening services including outreach.	- To our knowledge, this is the first community-based cRCT where the offer was made through usual primary care processes – opportunistically at clinics, at home or community centre – by a trusted nurse, doctor or kaiāwhina, utilising usual re-call systems.
Madi	Uptake and acceptability of human papillomavirus self-sampling in rural and remote aboriginal communities: evaluation of a nurse-led community engagement model	Dutton, et al.	2020	Australia	Multi-Methods	- Eight rural and remote communities participated in the pilot study. Notably, seven of these had minimal access to female General Practitioners (GPs) - Local Aboriginal Land Councils (LALC) identified a female employee or community member to recruit as the Community Engagement Worker (CEW) for each site. Their primary role was to engage and recruit women to the program, and support them along th…	- determine whether a community based HPV self-sampling model effectively recruited never-screened and under-screened Aboriginal women to participate in cervical cancer screening; assess the clinical outcomes, including follow-up; and explore the acceptability of the model from the perspective of the participants	Indigenous	215 (80.8% of the target sample size)	- 25–69 years	- The CEWs were members of the local Aboriginal community themselves, and had existing links with the community to identify and engage with local women about the program. Whilst some women were recruited at local community events, the majority were recruited via home visits. - the women identifying other family and friends for cervical screening. Whilst this inevitably would have resulted in bias…	- commumity health workers recruited eligible people through community events and primarly through home visits where the kits were handed out directly	NA	- 215 completed the test (266 were invited to participate)	NA	- There was overwhelming agreement that self-sampling removed the shame, intimidation, embarrassment, and pain that has historically been associated with clinician-collected Pap tests - Women felt they would not have completed cervical screening had this service not been available. - Positive aspects included: 1) the ability to complete the test in the home, and thus the accessibility and privacy…	- More than 90% of women were highly satisfied with the HPV self-sampling kit and the process involved -	- This study did not capture numbers of women who were approached and declined participation - There was not a structured process in place to document the follow-up outcomes for women and support required, including a formal clinical record review to determine actual disease burden from biopsy results	- It is a key recommendation of this study that women who are eligible for self-sampling continue to remain eligible to screen via this pathway, should they decline clinician-led screening in the future	- refer to table 3 for themes related to women's experiences with screening
Madi	Cervical cancer screening with clinic-based Pap test versus home HPV test among Somali immigrant women in Minnesota: a pilot randomized controlled trial	Sewali et al.	2015	USA	Multi-Methods	- Using a community-based participatory approach, Somali community health workers (CHWs) were trained by University researchers on the study protocol. The protocol training specifically included information on cervical cancer screening guidelines, randomization and a step-by-step instructional guide on use of the home-based HPV kit - We planned a two-group randomized controlled pilot study of 64 …	- The objective of this pilot study was to examine the difference in successful test completion rates between home-based HPV tests and clinic-based Pap tests among a sample of Somali immigrant women residing in the Minneapolis/St. Paul area, to see if this innovative testing method might improve cervical cancer screening rates in this particular underserved population. - The primary outcome was t…	Newcomer	64 (32 in both groups) - Of the 242 women screened for the study, 75 (31%) were eligible and 11 declined to participate	- This study recruited women of Somali origin, aged 25–70 years, who lived in the US for 10 years or less and who reported not having had a Pap test in the last 3 years.	- The Somali Health Solutions team recruited participants by word of mouth and flyers. - Following the training, all participants at the training completed a survey to determine study eligibility. Participants who were eligible and wanted to participate in the study provided informed consent and medical release forms for their primary care clinics to obtain potential Pap test data	- Prior to assessing eligibility and obtaining informed consent, we held an hour long informational meetings in an informal setting such as at one of the Somali women’s homes or at a community center identified by the Somali Health Solutions staff - Participants were then randomly assigned in a 1:1 ratio to the clinic based Pap test (were asked to follow up with their established clinic for a Pap…	Pap	- Analysis of the primary outcome indicated that participants randomized to the home test group were more likely to complete the test (21/32, 65.6%) than those randomized to the clinic group (6/31, 19.4%); P = 0.0002).	NA	- Women who reported having friends/family members to talk about cancer screening were approximately three times more likely to complete screening than those who do not, although this was not statistically significant after multivariate adjustment	- 83% of these women indicated that if they had to make a choice between using the self- collection and the regular Pap test, they would choose the self-collection method - All participants indicated that the instructions were easy to follow and had no difficulties in collecting the sample - More than 50% of the women reported that they were not at risk for cervical cancer and nearly 50% did not …	- we solely relied on selfreport of Pap test history; this may have created bias if some of the participants were not aware if they had the screening test within the past 3 years.	NA
Madi	Feasibility of Cervical Cancer Screening Utilizing Self-sample Human Papillomavirus Testing Among Mexican Immigrant Women in Harris County, Texas: A Pilot Study	Montealegre et al.	2015	USA	Multi-Methods	- screening questionnaire, educational brochure to review, participants answered a series of questions to assess their initial attitudes toward self-sampling - Results were communicated to participants via telephone 3–5 days after self-sampling. Those who were unreachable by phone were sent their results via certified mail	- Here we describe the acceptability of self-sample HPV testing among a sample of predominantly Mexican immigrant screening non-attendees in Harris County, Texas.	Newcomer	100	- Women were eligible to participate if they approached the study kiosk at the Consulate, were 21 years of age or older, were born outside the USA, reported not currently being pregnant, reported no history of hysterectomy or cervical cancer, and reported not having a Pap test in the past 3 years or more	- Prospective participants were referred to the research project by Ventanilla de Salud staff or recruited through announcements made in the general waiting area at the Consulate.	- At the consulate, they were then given a specimen collection kit and directed to a private restroom	NA	- Among the 18 HR–HPV positive women who received their results, nine (50 %) obtained a Pap test within three months of self-sampling.	- Among our participants, the primary barrier to follow-up was difficulty obtaining public healthcare coverage	- After selfsampling, most participants reported that the instructions were easy to understand (98 %) and that the self-sampler was easy to use (83 %). W	- Participants’ primary concern prior to self-sampling was fear of injury (32 %), followed by concerns that the test may not be safe (30 %) and concerns that the broom may not be clean (27 %).	- small sample size - given the public healthcare resources available to immigrants (both documented and undocumented) through the Harris County program, our results may not be generalizable to other areas of the country that do not have a similar program		- Accessed through U of C library - our data that suggest that women’s preference toward self-sampling may be related to its improved convenience and privacy over Pap testing
Madi	Empowering Low-Income Asian American Women to Conduct Human Papillomavirus Self-Sampling Test: A Community-Engaged and Culturally Tailored Intervention	Ma et al.	2022	USA	Multi-Methods	- We designed a culturally tailored intervention about the HPV self-sampling test and implemented the intervention in Asian American communities in the greater Philadelphia metropolitan area and in New York City - We also measured participants’ HPV-related knowledge, awareness of and attitude toward HPV self-sampling tests, perceived social support, and self-efficacy related to the HPV self-sampl…	- The goal of this study is to evaluate our culturally tailored intervention on HPV self-sampling test uptake.	Newcomer	156	- Participants were eligible for our study if they: (1) self-identified as Chinese, Vietnamese, or Korean; (2) were biologically female and between ages 30 and 55;	- We recruited participants through community-based organizations and faith-based organizations in 3 ethnicities: Chinese, Korean, and Vietnamese Americans. We first designed flyers in English, Chinese, Korean, and Vietnamese, in which we described the study goal, participant eligibility, and time and location for the intervention; flyers were distributed at community-based and faith-based organi…	The intervention consisted of 4 components: 1. address individual-level barriers, such as lack of awareness or knowledge among community members, we conducted group education workshops at local community-based and faith-based organizations. 2. the bilingual health educators provided written and illustrated instructions detailing how to perform the selfsampling test in Chinese, Korean, and Vietnam…	NA	- We examined the HPV self-sampling test update and found that all 156 (100%) participants completed the self-sampling test. The sample specimen from 2 out of the 56 (3.57%) Chinese participants and 9 out of the 50 (18%) Vietnamese participants did not contain any fluid, preventing testing for HPV DNA. Thus, in total, 92.95% of the participants provided satisfactory samples for testing.	NA	- However, more than half of participants (57.2%) reported having a physician that they visit regularly.	- The HPV-related knowledge score saw the greatest change from baseline - At post-intervention assessment, 74% of participants said that they were “confident” or “very confident” in their ability to conduct the self-sampled HPV test - participants had increased knowledge, perceived social support, self-efficacy, and comfort at post-intervention assessment	- We did not include a control group in this study, hence our inability to demonstrate that the positive changes in outcomes were entirely due to the effects of the intervention components		- During these educational workshops, our bilingual community health educators gave a presentation on HPV symptoms and transmission, CC risk factors, and early detection strategies and testing to participants. The participants also received individual handouts on HPVand CC prevention to take home or share with friends and family members - In developing the culturally tailored intervention, we use…
Madi	Reach and effectiveness of an HPV self-sampling intervention for cervical screening amongst under- or never-screened women in Toronto, Ontario Canada	Devotta et al.	2023	Canada	Multi-Methods	- self sampling kit sent to those via mail or handed out in person after the screening survey, if people said no to the kit they were put in cohort B (pap) - We also conducted a qualitative portion of the study that consisted of fve focus groups—3 with Cohort A and 2 with Cohort B—and interviews with key informants.	- In this paper we focus particularly on the reach (including describing the knowledge, attitudes and practices of women who participated) and efectiveness of the intervention	Newcomer	108 (across to arms)	- women aged 30–69 years; self-identifying as West or South Asian, Middle Eastern or North African; living in the Greater Toronto Area of Ontario, Canada	- Our recruitment strategy centred around the use of peers in the role of community champions (i.e. trusted female members of communities). - we considered a community champion to be a woman who identifed as West or South Asian, Middle Eastern or North African and had pre-existing connections with local community groups and organizations in the Greater Toronto Area and Peel Region. - Our communit…	- Tose who elected to try the HPV self-sampling kit were designated as Cohort A and those who did not were designated as Cohort B. Cohort A participants received their self-sampling kit in a postage paid return mailer box, either on the spot for in-person survey completion, or via mail for those that completed the survey over-the-phone. - All participants received a $30 honorarium, regardless of …	Pap	- 69 elected to try self sampling (A) and 39 who did not (B) - Of the 69 women who elected to try the self-sampling kit, 64 followed through, while 5 did not - Of the 64 that did try the kit, 61 mailed it in and 3 did not. - Of the 38 people we were able to get in contact with, 9 had gone on to get a Pap test and 28 did not. Of these 28, 19 had plans to get one in the near future, 5 did not and 4…	- participants in Cohort B were asked “why did you decide not to use the kit?” - For some it was fear of the unknown ‘[I] have never done a Pap so I didn’t know what it involved. It was a fear of doing something I’ve never done.’ For other it was fear that it could be uncomfortable ‘I was little uncomfortable with the thought of any pain, I have a low threshold for pain, even blood works make me …	- All 61 participants said they found the kit ‘user friendly’, and when asked if they found the instructions easy to follow, 57 said ‘yes’. 58 participants said they would do self-sampling again if it were ofered to them - “We can do it at home, privacy issue is resolved, saves time as no need to wait for appointments or go to hospitals.” - Some cited their interaction with the community champion…	- Te majority of participants correctly responded to the question asking about the purpose of a Pap test (96% in cohort A and 90% in Cohort B). - In both groups, most participants believed ‘having a Pap test lowers my chances of getting cervical cancer’ with 81% of Cohort A and 85% of Cohort B indicating they either ‘completely agreed’ or ‘agreed.	- issues getting ethics approval to use community champions due to concerns of coercion and privacy issues - were able to get approval but it took a long time	- Additionally, the majority of our recruitment occurred in the community and through word-of-mouth, in spaces that are not always used for healthcare. Tis allowed us to recruit people who may not have been accessing healthcare spaces. - Future research and screening programs should employ several community champions that refect this diversity of South Asian, West Asian, Middle Eastern and North …	For example, recruiting out of a healthcare centre or through healthcare providers would limit us to a sample of women who have at least some established level of access to healthcare - good study to base methods off of - used both qual and quant following the pilot - Overall, we successfully utilized a community-based recruitment strategy that was led by community champions to reach over 1600 wo…
Madi	Self-sampling for human papillomavirus in a community setting: feasibility in Hispanic women	Alba et al.	2008	USA	Multi-Methods	- self sampling followed by HPV testing / pap testing by a provider to compare the results of both - survey to assess satisfaction with self sampling	- The aim of the study was (a) to assess sensitivity and specificity of self-sampling in a community setting for identifying high-risk HPV infection and abnormal Pap smear and (b) to assess satisfaction with this collection method among Hispanic women	Newcomer	1213	- Hispanic women ages 18 years who had no Pap smear in the past year	- recruited by lay health workers from Latino Health Access, a community-based organization located in Santa Ana, CA - Recruitment was done through several mechanisms. Indirect methods included referrals from initial subjects, flyers distributed in places frequently visited by Hispanic women, and ads in Spanish local newspapers. Direct methods included personal invitations by lay health workers t…	- Volunteers who met inclusion criteria and signed informed consent were provided with a kit for selfcollection of a vaginal sample for HPV testing. A brief questionnaire to confirm eligibility criteria was administered at this time. Based on lay health workers’ previous experience in this community, the questionnaire did not include sociodemographic items other than age and country of origin due…	Self sampling and physician sampling for HPV	- 1213 performed self sampling - Of the 1,213 who performed unsupervised selfcollection of vaginal samples for HPV testing, 622 had a Pap smear and the first 386 of them had a physician collected cervical sample for HPV retesting	NA	- 33.7% report their satisfaction with overall experience (self sampling) - when participants were asked about the convenience of unsupervised self-sampling compared with physician sampling at a clinic, <2% reported poor or fair convenience of self-sampling	NA	- a positive HPV result does not guarantee that those women will follow-up for further evaluation or treatment at a clinic. - In addition, a negative HPV test in unsupervised selfsampling may prevent or delay seeking medical care for other gynecologic problems	NA
Madi	Self-collecting a cervico-vaginal specimen for cervical cancer screening: an exploratory study of acceptability among medically underserved women in rural Appalachia	Vanderpool et al.	2014	USA	Multi-Methods	- Survey prior to self-collection - self collection at the primary care clinic - follow-up interviews two months post-results notification with all study participants to answer any additional questions about their results, inquire about whether or not they discussed their HPV test results with friends, family members, and/or sex partner(s), and ascertain whether or not a subsequent Pap test appoi…	- The purpose of this exploratory study was to determine whether Appalachian Kentucky women would be amenable to self-collecting a cervico-vaginal specimen for HPV testing. - A secondary purpose of the study was to implement and track the results of a patient counseling and navigation intervention promoting guideline-recommended cervical cancer Pap smear screening among all women participating in…	Rural/Remote	31	- Women were eligible to be in the study if they were between the ages of 30 and 64, were not pregnant, reported not having a Pap test in the past four years, and had never tested positive for HPV infection.	- Recruitment took place at a free primary care clinic in southeastern Kentucky - A study nurse recruited potential study participants at the clinic on six separate days	- women completed a brief, self-administered questionnaire (Each participant received a $25 gift card at the time of interview as compensation for their time) - Women were verbally instructed by the nurse on the correct method for self-collecting a cervico-vaginal specimen. In addition, participants were given a graphic-based instruction sheet for use in the clinic restroom during the self-collec…	NA	- None of the women approached for participation declined, and all successfully completed the self-collected cervico-vaginal brush, indicating a 100% acceptance rate of this new high-risk HPV screening method	- Thirty percent of the sample indicated that they had minimal trust in doctors and the healthcare system, and that they did not have time to see a gynecologist.	NA	- Almost 90% of the women knew that cervical cancer is caused by HPV. - Forty percent of the women were “very afraid” of developing cervical cancer	- Small sample size and use of a convenience sample. - There is also the possibility for selection bias as study participants were already seeking services at a healthcare clinic and may be more proactive in accepting cervical cancer screening. - The study design also did not allow for a comparison of acceptance rates with women who were guidelinecompliant with cervical cancer screening	- our study tested a two-stage process – self-collection for HPV testing, followed by patient navigation to clinical services – which focused on eliminating barriers to cervical cancer screening among an at-risk population of women in a medically underserved, rural region of Kentucky	- all 26 women testing negative for high-risk HPV declined nurse-assisted navigation to follow-up Pap testing. - In contrast, four of the five women testing positive for high-risk HPV accepted navigation to the local health department for follow-up Pap testing - Even though all of the women testing negative for high-risk HPV initially declined navigation to Pap testing, at the two-month follow-up…
Madi	Randomized Intervention of Self-Collected Sampling for Human Papillomavirus Testing in Under-Screened Rural Women: Uptake of Screening and Acceptability	Racey et al.	2016	Canada	Multi-Methods	- This study was conducted in consultation with the local family health team (FHT), who are the sole primary care providers for the entire region, servicing *12,000 patients. The FHT comprised six general practitioners and three nurse practitioners. - Women were randomized to one of three interventions: (1) an at-home self-collected HPV kit, (2) an invitation for Pap testing, or (3) standard of c…	- The primary objective of this study was to determine if cervical cancer screening uptake would increase among underscreened women living in rural Ontario, Canada, if at-home self-collected sampling for HPV testing was offered as a primary cervical cancer screening modality, compared to an invitation for Pap cytology testing or no intervention	Rural/Remote	818 women were included in the study: 335 received a HPV self-collection kit, 331 received a reminder letter, and 152 received the standard of care	- under-screened women 30–70 years of age	- The Clinic identified under-screened women through their electronic medical record (EMR) system.	- HPV self-collected test arm. Women in the HPV test arm received a study information letter from the health clinic 2 weeks before receiving the at-home self-collected HPV kit. The letter informed women about the study and provided them the option to opt-out. - Invitation for Pap testing arm. Women in the Pap testing arm were sent an invitation letter for Pap testing that asked women to call thei…	Three way comparison - pap, self sample, control	- In the HPV self-sampling arm, 21% (70/335) returned the self-collected samples and questionnaire and 11% (37/335) opted to undergo Pap testing at the clinic such that in total, 32% were screened after receiving a self-collected HPV kit. Over 60% of the women (43/70) returned the self-collected HPV kit in the first month. - In the Pap test arm, 15.4% (51/331) accepted the invitation for Pap test…	NA	- Eighty-eight percent responded that they would recommend HPV testing to a family member or friend, and 90% said they would be likely to use self-collected HPV testing in the future - The mean acceptability score was 92.6% (SD = 1.5), among the 70 women who elected to undergo selfcollected sampling. - The majority of women (89.7%) who completed the questionnaire found self-collected sampling for…	NA	- A limitation was that we only measured acceptability among women who completed a test, limiting our ability to generalize findings. - There was a change to the protocol for follow-up phone calls to women in the Pap testing arm during the study. Only 20% of the women in the Pap invitation arm received a followup phone call due to a shortage of clinical resources.	NA	- Accessed through U of C library
Madi	Assessing the impact of mailing self-sampling kits for human papillomavirus testing to unscreened non-responder women in Manitoba	Jalili et al.	2019	Canada	Quantitative	- Each study arm was stratified by area of residence to ensure that approximately half the participants resided in urban areas and half resided in rural areas of Manitoba.	- The purpose of the present study was to comparemcervical cancer screening participation in unscreened non-responder women in Manitoba who were mailed and not mailed a self-sampling kit for hpv	Rural/Remote	529 (intervention group - 261 rural), 523 (control group)	- Unscreened women were those who had no record of a Pap test in the CervixCheck registry in Manitoba and who had been registered for a minimum of 5 years. - Non-responders were women who had been sent an invitation letter to be screened, but who remained unscreened. - 30 and 65 years of age	- CervixCheck registry,	- Women in the intervention group were mailed a selfsampling kit for hpv through Canada Post. The control group received no additional communication from CervixCheck, per current program operations. Both study groups were followed for a period of 6 months to determine screening participation. The 6-month follow-up period was selected so as to compare outcomes with outcomes from a previous study t…	Pap	- By the end of the 6-month study period, 51 women (27 lived in a rural area) in the intervention group (9.6%) had completed an hpv test; 6 (1.1%) had completed a Pap test; 16 (3.0%) had declined participation; and 456 (86.2%) had not responded or participated in screening - Area of residence (rural vs. urban) and age were not significant predictors of screening participation	NA	NA	NA	- The main limitation of the study is that it did not address how varied implementation strategies might affect screening participation by unscreened women who are offered an hpv self-sampling kit. For example, how factors other than the hpv self-sampling device itself might have affected screening participation is unknown	- our future research will examine the effect of an opt-out letter notifying women that they are overdue for cervical cancer screening, that CervixCheck will be mailing them an hpv self-sampling kit, and that they should notify the program, if they do not wish to participate; and the impact of partnering with a community health clinic or nursing station to provide an hpv self-sampling kit that wo…	- invitation letter with a translated phrase on the reverse that appeared in 21 languages (giving a contact number to review the information with a service provider and an interpreter), - compared to toher canadian studies: We expected that the screening participation in our study would be lower than in other studies because the intervention group in our study included only unscreened non-respond…
Madi	Effect of vaginal self-sampling on cervical cancer screening rates: a community-based study in Newfoundland	Duke et al.	2015	Canada	Multi-Methods	- we devised a communitybased study in rural areas of Newfoundland and Labrador (NL), Canada, to determine whether offering selfcollected HPV testing might be an effective tool to increase cervical cancer screening participation - post eval survey was used	- Our objective was to determine if the introduction of a selfcollection strategy for HPV screening would increase primary cervical cancer screening in a community-based setting in rural NL.	Rural/Remote	A (1760), B (2761), C (1536)	- 30–69 years	- community-based cohort design	- The two intervention communities (Communities A and B) were rural communities of similar size and demographic composition with the presence of academic faculty members to oversee the research. The control community was selected because it was demographically similar to the two study communities - Potential participants living in Community A were given the option of being screened for HPV infect…	A - self sampling plus education, B - pap plus education, C - control (no education, only pap)	- 837 HPV self-collection kits were taken from the distribution sites in Community A during 2010 and 2011, and 168 (20.1 %) of these were returned for processing - The overall response rate of eligible women to self-collection in Community A was 9.5 % (168/1760) - In Community B, 374 (13.5 %) women presenting for Pap smears agreed to be part of the study and provided information on themselves and…	NA	NA	- The telephone survey assessing the penetration of the educational and promotional campaigns indicated that well over half of the eligible women in Community A (167/276, 74.6 %) and just under a third of eligible women in Community B (117/381, 30.7 %) were aware of the cervical cancer research study in their area - Overall, participant satisfaction with the kits was high, with 114 (67.9 %) parti…	- Selfsampling is fast, women are overwhelmingly able to collect adequate samples, and it can be implemented in communities that have no or very few regular primary care providers. However, our study makes clear the fact that simply providing kits may not sufficiently encourage women to self-collect, and further study of more targeted or direct distribution methods is warranted prior to wider use…		- The research nurse in Communities A and B gave presentations on cervical cancer screening to various community groups as part of an educational campaign. - we also learned of a nurse practitioner and a young family physician in Community C who both began practicing in the community immediately prior to and during the study period, both of whom were proactive with cervical cancer screening.
Madi	HPV self-sampling in cervical cancer screening: the effect of different invitation strategies in various socioeconomic groups - a randomized controlled trial	Tranberg et al.	2018	Denmark	Quantitative	- eligible participants were allocated into one of three study arms - Participation in the CHOiCE trial was defined as returning a self-sample or attending regular cytology screening at the GP within 180 days after receiving the second reminder.	- The aims were to assess if HPV self-sampling has an effect on screening participation among all socioeconomic groups of non-participants, and if the two invitation strategies for offering self-sampling influence the participation rate equally	Rural/Remote + newcomer	- 9,791 women due to receiving a second reminder were randomized into three groups	- 30–64 years who were due to receive the second reminder from the Central Denmark Region - urban, semi urban and rural area codes were recruited - rural area (thinly populated area: more than 50% of the population lives in rural grid cells) - western and non western immigrants	- registry data from nationwide registries applied to data from a population-based randomized controlled effectiveness trial (Cervical HOme-based CancEr screening [CHOiCE])	- The women were either 1) mailed a self-sampling kit directly to their home addresses (directly mailed group); 2) mailed an invitation to order the kit by e-mail, text message, phone, or via a website (opt-in group); or 3) mailed the standard second reminder to attend regular cytology screening (control group).	Three way comparison between opt-in, opt-out and pap (control)	Opt-out vs control - western immigrants = 18.1% greater participation - non western immigrants = 13.4% greater - rural = 12.3% greater -Compared with the control group, the greatest differences in participation by mailing the kit directly were found for Western immigrants Opt-in vs control - western immigrants = -0.2% less participation - non western immigrants = 2.5% greater - rural = 5.7% great…	NA	- across all socioeconomic groups, mailing the self-sampling kit directly to women yielded a higher screening participation than a standard second reminder to attend regular cytology screening	NA	NA	NA	NA
Madi	Effect of Educational Intervention on Self-Sampling Acceptability and Follow-Up Paps in Border Dwelling Hispanic Females	Molokwu et al.	2018	USA	Multi-Methods	- to compare the effect of a high-intensity educational intervention on women's preferences for self-sampling for HPV for cervical cancer screening. Secondary outcomes included comparing the effect of the 2 intervention types on test acceptability, HPV knowledge, and subsequent completion of cervical cancer screening.	- The aims of our study were to evaluate the effect of a community health outreach worker (promotora)-led educational intervention compared with control on cervical cancer screening preference (Pap smear vs self-sampling) and to determine the effect of this preference on subsequent screening completion among a group of predominantly Hispanic women on the US-Mexico border who are due for cervical …	Newcomer	202 (102 low intensity group and 100 high intensity)	- Inclusion criteria for the study were women aged 30 to 65 years who had not had cervical cancer screening in the previous 3 years	- Participants were recruited from various community sites - A promotora recruited women from their homes or through advertisements placed in participating community-based organizations and community health centers.	- Women received either a high-intensity educational intervention delivered by a promotora or low-intensity educational intervention. - In the high-intensity arm, participants received educational sessions that were conducted individually at recruitment sites or in the participant's home by a promotora (community health worker). Sessions were conducted in English or Spanish based on participants'…	Pap	- We did not observe a significant difference for test preference between high- and low-intensity groups - Change in HPV knowledge was the only factor that was found to be significantly associated with completion of Pap smear at 12-month postintervention - The high-intensity educational intervention resulted in a statistically significant higher self-sampling acceptability score - Compared with P…		- Although the intervention did not significantly affect test preference, it did significantly improve selfsampling acceptability scores especially in the characteristics of ease and embarrassment but not in convenience and fear of harm	- The high-intensity education also resulted in greater improvement in the HPV knowledge scores		- generalizability - small sample size	- accessed through U of C library ** doesn't specifically indicate if they immigrated to the states
Caitlin	Feasibility and acceptability of telehealth and contactless delivery of human papillomavirus (HPV) selftesting for cervical screening with Maori and Pacific women in a COVID-19 outbreak in Aotearoa New Zealand	EXCLUDE - CANT ACCESS
Caitlin	Primary HPV-based self-sampling screening with the COBAS HPV test for underserved greek women. Preliminary results of the grecoself study	EXCLUDE - ABSTRACT
Caitlin	Clinic-based pap test versus HPV home test among somali immigrant women in Minnesota: A randomized controlled trail	Duplicate
Caitlin	Implementation of a Cervical Cancer Screening Strategy Using HPV Self-Sampling for Women Living in Rural Areas	EXCLUDE - CANT ACCESS
Caitlin	Opportunities for HPV self-collection to improve cervical cancer screening uptake in street entrenched women in rural regional centres	EXCLUDE - ABSTRACT
Madi	Acceptability and usability of self-collected sampling for HPV testing among African-American women living in the Mississippi Delta	EXCLUDE - wrong population
Madi	A randomized trial of mailed HPV self-sampling for cervical cancer screening among ethnic minority women in South Florida	DUPLICATE																		See article screened by Caitlin below

## Sheet: Indigenous
Assigned to:	Title	Authors	Year	Country	Study Design	Methods	Objectives / Intended Outcomes	Priority Population	Sample Size (n=?)	Population details (age, location, group, inclusion criteria etc.)	Participant recruitment / identification	Intervention (physician provided/mail-in/etc.) + study arms (n=?)	Comparator	Outcome: Uptake/Rates	Outcome: Barriers	Outcome: Facilitators	Outcome: Knowledge / Attitudes	Sources of Bias (limitations, etc.)	Recommendations / Next Steps	Other considerations
Madi	Uptake and acceptability of human papillomavirus self-sampling in rural and remote aboriginal communities: evaluation of a nurse-led community engagement model	Dutton, et al.	2020	Australia	Multi-Methods	- Eight rural and remote communities participated in the pilot study. Notably, seven of these had minimal access to female General Practitioners (GPs) - Local Aboriginal Land Councils (LALC) identified a female employee or community member to recruit as the Community Engagement Worker (CEW) for each site. Their primary role was to engage and recruit women to the program, and support them along th…	- determine whether a community based HPV self-sampling model effectively recruited never-screened and under-screened Aboriginal women to participate in cervical cancer screening; assess the clinical outcomes, including follow-up; and explore the acceptability of the model from the perspective of the participants	Indigenous	215 (80.8% of the target sample size)	- 25–69 years	- The CEWs were members of the local Aboriginal community themselves, and had existing links with the community to identify and engage with local women about the program. Whilst some women were recruited at local community events, the majority were recruited via home visits. - the women identifying other family and friends for cervical screening. Whilst this inevitably would have resulted in bias…	- commumity health workers recruited eligible people through community events and primarly through home visits where the kits were handed out directly	NA	- 215 completed the test (266 were invited to participate)	NA	- There was overwhelming agreement that self-sampling removed the shame, intimidation, embarrassment, and pain that has historically been associated with clinician-collected Pap tests - Women felt they would not have completed cervical screening had this service not been available. - Positive aspects included: 1) the ability to complete the test in the home, and thus the accessibility and privacy…	- More than 90% of women were highly satisfied with the HPV self-sampling kit and the process involved -	- This study did not capture numbers of women who were approached and declined participation - There was not a structured process in place to document the follow-up outcomes for women and support required, including a formal clinical record review to determine actual disease burden from biopsy results	- It is a key recommendation of this study that women who are eligible for self-sampling continue to remain eligible to screen via this pathway, should they decline clinician-led screening in the future	- refer to table 3 for themes related to women's experiences with screening
Madi	Feasibility of self-sampling and human papillomavirus testing for cervical cancer screening in First Nation women from Northwest Ontario, Canada: a pilot study	Zehbe et al.	2011	Canada	Multi-Methods	- Eligible women who wanted to participate in the pilot following an education session, contacted study staff. The research nurse provided information orally and through the informed consent form, which was explained to, and signed by, the volunteer before taking a self-sample. After taking the self sample, the questionnaire was answered, numbered and sent to the research team in a sealed envelop…	- To assess the feasibility of this alternative method we used a questionnaire in which demographics and cervical cancer knowledge, self-sampling and sexual health were investigated. - Sample adequacy and HPV testing methods were also evaluated.	Indigenous	49 (47 First Nations, 2 Metis)	- self-reported First Nation ethnicity; registered in FWFN - aged 25 to 59 years and had - a command of the English language.	- 10 communities were identified as part of one strategic region of the Anishinabek Nation inhabiting the northern shore of Lake Superior from Pigeon River to Batchawana Bay. - women were not approached individually	- A public health nurse practitioner (project nurse) served as primary contact for the participating women. To enrol approximately 50 volunteers, recruitment and info dissemination through a community meeting with an information poster; flyers posted in public places within the community; flyers sent to all community households through the weekly Band newsletter and flyers distributed at parentin…	NA	- NA as the goal of the pilot was to 1) look at positivity rates and 2) gather survey data - overall participation rates was not presented as women were not approached to participate but had to approach the study team themselves		- 87.2% (41/47) indicated willingness to participate in self-sampling screening in the future - For acceptability of self-sampling, 77.1% (37/48) found self-sampling easy, 6.3% (3/48) were mid-range, 16.7% (8/48) - The preferred way to learn about sexual health was through interaction with an HCP: 35% (47/133). This was followed by the use of audiovisual material that is, watching a DVD or lookin…	- Importantly, 87.8% (43/ 49) had knowledge ranging from “some to very good” and about half of the participants had “good or very good” knowledge about cervical cancer.	- Our participants also had easy access to the collaborating health centre in FWFN, which advocates Pap tests for First Nation women and may explain the rather high reported rate of previous Pap tests. - The situation differs for members of the other Northern Superior communities who are required to travel to larger cities like Thunder Bay for their health needs	- key question to be answered in the larger study will be how best to reach and provide sexual health education to underscreened women. - We will also ask participating women to explicitly rate their discomfort by comparing HCP sampling with self-sampling.	- Women were enrolled from age 25 rather than age 30 because Canadian First Nation women exhibit earlier onset of cervical cancer than the general population and HPV testing is recommended at an earlier age. **use community ambassadors
Madi	Community-randomised controlled trial embedded in the Anishinaabek Cervical Cancer Screening Study: human papillomavirus self-sampling versus Papanicolaou cytology	Zehbe et al.	2016	Canada	Quantitative	- We performed a two-arm, community-randomised controlled trial with 11 First Nations communities in the Thunder Bay district of Northwest Ontario, Canada.	- The primary outcomes of the trial were initial and cumulative screening uptakes as well as participant psychosocial status.	Indigenous	834 randomized into two arms (A=404, B=430)	- We identified 1002 eligible women (denominator) between 25 and 69 years old as being band members in one of the 11 participating First Nations communities and living on their own or another reserve, on Crown land or off-reserve with their main address in the Thunder Bay district	- CBRAs invited women to participate in the ACCSS trial after an educational event and other recruitment strategies (Participation recruitment included individual (eg, door-to-door visits and in-person appointments) and communal (eg, educational events, health fairs and well women clinics) strategies). - 11 communities (6 in group A and 5 in B)	- In the intervention group (arm A), women were first offered HPV testing using self-sampling and in the control group (arm B), women were first offered Pap testing. - a survey was administered that looked at ratings of comfort with the self sampling device	self sampling versus pap	- The cumulative uptake of screening was 20.6% in arm A and 16.0% in arm B (study participation was lower than what was expected) - However, rates were very different community to community (11 total)	- Qual results were presented in a separate paper	- Qual results were presented in a separate paper	- Qual results were presented in a separate paper	Did not present this	Did not present this	- During an All Chiefs’ meeting in Thunder Bay, the study lead was invited to present the proposed pilot where the chiefs then decided to participate in the pilot **use community ambassadors
Caitlin	Human Papillomavirus (HPV) Self-Sampling among Never-and Under-Screened Indigenous Maori, Pacific and Asian Women in Aotearoa New Zealand: A Feasibility Study	Bromhead et al.	2021	New Zealand	Qualitative	This single-arm feasibility and acceptability study. This feasibility study explored key elements of the HPV self-sampling process in never- and under-screened Māori, Pacific and Asian women: (1) co-creating the HPV self-sampling materials; (2) contacting and inviting eligible women to participate; (3) collecting survey data to understand the women’s experience of the existing screening process a…	To trial novel wrap-around, culturally safe HPV self-sampling and follow-up processes for never- or under-screened wahine Maori, Pacific and Asian women. The study was also designed to optimise women’s experience of HPV self-sampling via a series of focus groups, including knowledge and acceptability questionnaires. While using a co-design and health literacy approach, our study aimed to evaluate…	Indigenous	84	never- and under-screened (≥5 years overdue) 30–69-year-old women from general practices in Auckland, Aotearoa	A Maori cervical screening specialist nurse was appointed to work with participating ¯ practices to invite eligible women to attend a clinic and “do a new self-sample for cervical screening”. If women could not be reached initially, a total of five contact attempts were made, including phone calls at different times/days, texts and in some cases, a letter. Women who could be contacted and who agr…	Women who agreed to participate attended a clinic for a 30 min consultation with the study nurse. In a private space, the research nurse explained kanohi ki te kanohi (face-to-face) the study and discussed the participant information sheet and consent form and answered any questions. Women were offered the knowledge questionnaire, then the research nurse explained how to take the self-sample usin…	N/A	out of 366 eligible women identified, 84 collected self samples	There was a negative response to anatomically explicit pictures in the sampling instructions.	Having a study nurse who was also wāhine Māori working with them was conducive to culturally competent care and enhanced the acceptability of HPV-SS. Tautoko, or the support they received, was important for all the women spoken to. The study nurse helped the women make decisions they were comfortable with, and for many, this was integral to their decision to do the self-sample. Almost all of the …	no respondents said they would prefer a nurse/doctor to take a usual smear test—all preferred self-sampling either at home (33/58) or a GP clinic (25/58). None responded that they did not intend to screen (either by smear or self-sample) again. The most popular preference for receiving a self-sample kit was for it to be posted (25/60), followed by picking it up from the GP clinic (17/60), while t…		we adapted several of the patient materials originally used in the Australian iPap study (exploring the acceptability of self-sampling in Australian urban and rural women who were non-respondents to the regular screening programme, aged 30–69) for an Aotearoa context. This included changes appropriate to the health literacy demands placed on women and cultural appropriateness. It also included ke…	We found the best uptake of self-sampling was at focus groups.
Caitlin	Acceptability of human papillomavirus self-sampling for cervical-cancer screening in under-screened Maori and Pasifika women: a pilot study	Brewer et al.	2019	New Zealand	Qualitative	Participants were asked to: 1) examine three different self-sampling devices; 2) complete a questionnaire; and 3) take a self-sample with at least one device (of their choice).	This pilot study aimed to: 1) examine the acceptability of self-sampling among un- and under-screened Māori, Pacific, and Asian women; 2) enquire about the level of comprehension of the instructions for self-sampling devices; 3) develop laboratory methods for processing cobas® Chlamydia trachomatis/Neisseria gonorrhoeae (CT/NG) swabs, Herswab™ and the Delphi Screener™ through the cobas 4800 HPV t…	Indigenous	56	Women aged 30–69 years who had ever been sexually active and who had not had a hysterectomy, Maori and Pacifika women	Eligible women were identified by Porirua Union and Community Health Service (PUCHS). Initially, recruitment was through mail, but this was replaced by recruitment through PUCHS nurses’ community outreach and home visits, a presentation at a community health promotion meeting, and at the regular screening clinics. Any woman who attended a screening clinic and was interested in and eligible for th…	The questionnaire was completed face-to-face followed by self-sampling and cytology at the clinic. Participants were given a package that included a brochure on cervical cancer and HPV infections, and three self-sampling devices, with written and illustrated instructions from the device manufacturers. The three self-sampling devices were: i) HerSwab (Eve Medical), ii) Delphi Screener (Rovers Medi…	Comparison of 3 SS kits	Before trying any devices, 78.0% (n=39/50) of women said that they would prefer to self-sample next time they were due for screening, and 22.0% (11/50) said that they would prefer a physician-collected sample (PCS; six women did not answer the question). After trying a device, fewer women (65.9%; n=29/44) preferred to self-sample next time, fewer women (7/44) preferred a PCS, and 8/44 expressed n…	N/A	The study found that 42% (n=22/52, four women did not answer the question) of women would prefer to receive the self-sampling kit through the post, but most (58%; 30/52) would prefer to collect the kit from a clinic.	N/A	The limitations of the study include the small sample size, which limits the reliability and generalisability of the findings. The number of women who were told about the study and invited to participate was unfortunately not recorded due to the large workload of the PUCHS nurses. The participants also included women who were younger than the target age range, and who were not of the target ethni…	N/A	Slightly more of the women who preferred to receive the kit through the post were aged <40 years (55%; n=12/22), whereas slightly more of the women who preferred to collect the kit from a clinic were aged ≥40 years (55%; 16/29).
Caitlin	Acceptability of human papillomavirus (HPV) self-sampling among never- and under-screened Indigenous and other minority women: a randomised three-arm community trial in Aotearoa New Zealand	Brewer et al.	2021	New Zealand	Quantitative	Three arm randomized trial conducted and follow-up statistical analysis of participation rates for each type of HPV screening.	We aimed to evaluate whether two specific invitation methods for self-sampling could increase screening participation. We also sought to obtain information on the resources required to achieve 90% follow-up of hrHPV-positive women. Our study is the first to evaluate the effectiveness of a mailed self-sampling kit for cervical-cancer screening in Aotearoa New Zealand.	Indigenous	3553	never- and markedly under-screened (≥5 years overdue) 30-69-year-old Maori, ¯ Pacific, and Asian women.	Participating clinics were selected because they had enrolled populations with high proportions of Maori, ¯ Pacific, and Asian women who were never- or under-screened. Clinics were also selected to represent a range of small and large clinicsRandomisation was undertaken as follows: the clinics sent a list of women who had been identified as being eligible for the study to the study programmer who…	Arm 1: clinic-based self-sampling, in which women were invited to take a self-sample at their usual general practice (GP); Arm 2: home-based self-sampling, in which women were mailed a kit and invited to take a self-sample at home	Arm 3: Usual care in which women were offered standard cytology (at a clinic, at an independent service provider, or with the study nurse).	Sending women a self-sample kit for hrHPV testing at home resulted in statistically significantly (p≤0.001) higher participation than an invitation to have a usual-care cytology sample in the clinic among Maori ¯ (14.6% vs. 2.0%) and Asian (18.5% vs. 4.5%) and, to a lesser extent, among Pacific women (8.8% vs. 1.7%). In the fully adjusted models, Maori ¯ women randomised to the homebased group we…	An invitation to take a self-sample at a clinic was less effective, suggesting that at least some of the barriers to clinic attendance are the same whether for self-sampling or a healthcareprofessional-taken sample. Known opportunity costs and barriers to clinic attendance for cervical screening may explain why a higher proportion of home-based women participated	N/A	N/A	The limitations of our study include the inability to ascertain whether we had the correct address or phone number for all women who appeared to be non-responders, a known limitation of population-recruitment approaches. Participation may therefore be underestimated. We invited women only in the Auckland and Waitemata¯ DHB areas, so our findings may not be generalisable to women outside of those …	N/A	Based on feedback from the participating clinics, it may be that our participation is an underestimate of potential uptake if selfsampling were to be integrated into the NCSP because, in the setting of the study, there was a need to provide a large amount of trial-specific information; reading all this may have been a barrier, particularly for women for whom English is a second language and those…
Madi	Reaching under-screened/never-screened indigenous peoples with human papilloma virus self-testing: A community-based cluster randomised controlled trial	MacDonald et al.	2021	New Zealand	Quantitative	- He Tapu Te Whare Tangata is a community-based cluster randomised trial (cRCT) which offered HPV self-testing (intervention) to under-screened/never-screened women and compared uptake of screening with the uptake of usual care – a cervical smear (control).	- The aim of the present study was to increase cervical screening coverage for under-screened/ never-screened Māori women by offering HPV self-testing	Indigenous	500 Maori in intervention arm, 341 in control arm	- Maori women in the far north, many living rurally - Inclusion criteria were women, 25 to 69 years, who had not had a cervical smear for ≥4 years and were registered with one of the study clinics.	Eligible women were identified through patient management systems (PMS) in each clinic forming the clinic cohort for screening in each arm	- The clinic groups (3 clinics were chosen to reach the intended sample size) were then randomised to either treatment or control arms on the roll of a die, performed by a Declarations Officer of the NZ Police Force. - Staff in control and intervention clinics were given an educational update on HPV - Clinics were encouraged to use their usual methods to invite women to cervical screening includi…	Pap	- 500 eligible Māori women in the intervention arm, 295 (59.0%) were screened with an HPV self-test or/ and smear. 73.6% in intervention opted for self sampling and 13.9% chose the pap test. - Of 254 Māori women who accepted an HPV self-test, 230 (90.6%) took their own swab, 21 (8.3%) were taken by a clinician, usually a nurse, three were not stated; 187 (73.6%) were taken at the clinic, 57 (22.4…	NA	NA	NA	- control and intervention groups had differential characteristics hence the analysis was corrected to take into account these variables.	- These findings may be generalisable to other under-screened/ never-screened Indigenous populations in Canada, NZ, Australia and the USA. - This study was run in the community by primary care clinicians, not researchers. Both arms had active cervical screening services including outreach.	- To our knowledge, this is the first community-based cRCT where the offer was made through usual primary care processes – opportunistically at clinics, at home or community centre – by a trusted nurse, doctor or kaiāwhina, utilising usual re-call systems.

## Sheet: Newcomer
Assigned to:	Title	Authors	Year	Country	Study Design	Methods	Objectives / Intended Outcomes	Priority Population	Sample Size (n=?)	Population details (age, location, group, inclusion criteria etc.)	Participant recruitment / identification	Intervention (physician provided/mail-in/etc.) + study arms (n=?)	Comparator	Outcome: Uptake/Rates	Outcome: Barriers	Outcome: Facilitators	Outcome: Knowledge / Attitudes	Sources of Bias (limitations, etc.)	Recommendations / Next Steps	Other considerations
Madi	Reach and effectiveness of an HPV self-sampling intervention for cervical screening amongst under- or never-screened women in Toronto, Ontario Canada	Devotta et al.	2023	Canada	Multi-Methods	- self sampling kit sent to those via mail or handed out in person after the screening survey, if people said no to the kit they were put in cohort B (pap) - We also conducted a qualitative portion of the study that consisted of fve focus groups—3 with Cohort A and 2 with Cohort B—and interviews with key informants.	- In this paper we focus particularly on the reach (including describing the knowledge, attitudes and practices of women who participated) and efectiveness of the intervention	Newcomer	108 (across to arms)	- women aged 30–69 years; self-identifying as West or South Asian, Middle Eastern or North African; living in the Greater Toronto Area of Ontario, Canada	- Our recruitment strategy centred around the use of peers in the role of community champions (i.e. trusted female members of communities). - we considered a community champion to be a woman who identifed as West or South Asian, Middle Eastern or North African and had pre-existing connections with local community groups and organizations in the Greater Toronto Area and Peel Region. - Our communit…	- Tose who elected to try the HPV self-sampling kit were designated as Cohort A and those who did not were designated as Cohort B. Cohort A participants received their self-sampling kit in a postage paid return mailer box, either on the spot for in-person survey completion, or via mail for those that completed the survey over-the-phone. - All participants received a $30 honorarium, regardless of …	Pap	- 69 elected to try self sampling (A) and 39 who did not (B) - Of the 69 women who elected to try the self-sampling kit, 64 followed through, while 5 did not - Of the 64 that did try the kit, 61 mailed it in and 3 did not. - Of the 38 people we were able to get in contact with, 9 had gone on to get a Pap test and 28 did not. Of these 28, 19 had plans to get one in the near future, 5 did not and 4…	- participants in Cohort B were asked “why did you decide not to use the kit?” - For some it was fear of the unknown ‘[I] have never done a Pap so I didn’t know what it involved. It was a fear of doing something I’ve never done.’ For other it was fear that it could be uncomfortable ‘I was little uncomfortable with the thought of any pain, I have a low threshold for pain, even blood works make me …	- All 61 participants said they found the kit ‘user friendly’, and when asked if they found the instructions easy to follow, 57 said ‘yes’. 58 participants said they would do self-sampling again if it were ofered to them - “We can do it at home, privacy issue is resolved, saves time as no need to wait for appointments or go to hospitals.” - Some cited their interaction with the community champion…	- Te majority of participants correctly responded to the question asking about the purpose of a Pap test (96% in cohort A and 90% in Cohort B). - In both groups, most participants believed ‘having a Pap test lowers my chances of getting cervical cancer’ with 81% of Cohort A and 85% of Cohort B indicating they either ‘completely agreed’ or ‘agreed.	- issues getting ethics approval to use community champions due to concerns of coercion and privacy issues - were able to get approval but it took a long time	- Additionally, the majority of our recruitment occurred in the community and through word-of-mouth, in spaces that are not always used for healthcare. Tis allowed us to recruit people who may not have been accessing healthcare spaces. - Future research and screening programs should employ several community champions that refect this diversity of South Asian, West Asian, Middle Eastern and North …	For example, recruiting out of a healthcare centre or through healthcare providers would limit us to a sample of women who have at least some established level of access to healthcare - good study to base methods off of - used both qual and quant following the pilot - Overall, we successfully utilized a community-based recruitment strategy that was led by community champions to reach over 1600 wo…
Caitlin	HPV Self-Sampling for Cervical Cancer Screening Among Ethnic Minority Women in South Florida: a Randomized Trial	Carrasqiullo et al.	2018	USA	Mixed Methods	A 26-week single-blind randomized pragmatic clinical trial. Participants were randomized into three groups: (1) outreach by CHWs and provision of culturally tailored cervical cancer screening information (outreach), (2) individualized CHW-led education and navigation to local health care facilities for Pap smear (navigation), or (3) individualized CHW-led education with a choice of HPV self-sampl…	To compare a community health worker (CHW)-led HPV self-sampling intervention with standard cervical cancer screening approaches.	Newcomer	601	Miami women who (1) self-identified as Hispanic, Black, or Haitian, (2) age 30–65 years, and (3) did not have a Pap smear within the past 3 years.	CHWs employed by community health centers (CHCs) in each neighborhood recruited potential participants at community venues (e.g., stores, community events, churches). They explained the study and assessed study eligibility. Detailed contact information was obtained from eligible women expressing interest in participating. CHWs provided this information to research assistants (RAs), who contacted …	Outreach Group During the study intake visit, all participants were provided a culturally tailored brochure in their preferred language (English, Spanish, or Haitian Creole). The brochure explained the importance of cervical cancer screening and community-specific information on how to obtain a Pap smear at the CHC or other local facilities offering free or low-cost Pap smears. These brochures we…	Comparison of 3 intervention groups	In total, there were 265 women in the study who completed HPV self-sampling. This included the 133 of 207 (64%) of women in the self-swab group who chose to have the HPV self-sampling. In addition, at study conclusion, there were 174 women in the outreach and navigation groups who reported not being screened. After their exit interview, we offered these women the opportunity to have HPV self-samp…	for women who were not income-eligible for free Pap smears, even nominal co-payments may be a differential barrier to screening.	We found that nearly a third of women in the outreach alone group were screened, suggesting tailored public health outreach by itself can have an important impact. However, this finding should be interpreted with caution as we relied on self-reports which may have led to over-reporting	We also found that women in the self-swab option group had greater increases in cervical cancer knowledge than women in either the navigation or the outreach group. This finding is particularly interesting because women in the self-swab option group received the same education as women in the navigation group. We believe that perhaps providing women a more active role in the screening process wit…	while our results demonstrated HPV self-sampling to be an efficacious cervical cancer screening strategy, we acknowledge that this finding may not apply to all groups of underserved and ethnic minority women. Our sample size was small, and the majority of our sample included Hispanic and Haitian immigrant women who were recruited from public areas.
Caitlin	Acceptability and feasibility of HPV self-sampling for cervical cancer screening among patients and providers in two safety-net institutions in Miami	Ilangovan et al.	2016	USA	Mixed Methods	Haitian and Latina women aged 30–65 years with no Pap smear in the past 3 years were recruited. Women were offered HPV self-sampling or traditional Pap smear screening. The acceptability of HPV self-sampling among patients and clinic staff was assessed. If traditional screening was preferred the medical record was reviewed.	To assess the feasibility and acceptability of HPV self-sampling among patients and clinic staff in two such settings.	Newcomer	180	30-65 years, in Miami, Female patients were eligible if they were aged 30–65 years, had not had a Pap smear in the prior 3 years, were not pregnant, were not actively menstruating, and had not had their uterus removed.	Participants were recruited by convenience sampling from the waiting room of the above two clinics. Recruitment took place between May 2013 and February 2014. Two community health workers (CHWs) recruited participants. The CHW assigned to the ACC was Hispanic and the other at CHS was Haitian. At ACC our CHW was instructed to only recruit Latina patients and at CHS only Haitian patients. At both s…	Participants then received a short information session on cervical cancer screening using a flipchart. The flipchart described normal female anatomy, provided information about cervical cancer progression and risk factors. Women then received information about the traditional Pap smear as a means to screen for cervical cancer and an explanation of HPV self-sampling as an alternative means of scre…	Pap Test. If HPV self-sampling was not chosen, the participant was encouraged to discuss the need for cervical cancer screening with her provider during the visit. Detailed contact information was also obtained from these women. Five months after the visits, the medical records were examined to determine whether they had a Pap smear performed at their clinical site.	67% of women offered SS accepted it and all who accepted followed through with screening.	N/A	Cultural sensitivity, patient communication, and motivational interviewing techniques are all important features of CHW training programs and likely contributed to the high uptake.	99% of those who completed SS considered it to be an acceptable method.	Did not examine acceptability among women having a Pap smear and thus there is no control group to directly compare acceptability of HPV self-sampling versus Pap smear	Additional work should explore whether strategies such as providing self-sampling devices through the mail, as has been shown in other countries, can also improve participation in cervical cancer screening in the United States
Madi	Self-sampling for human papillomavirus in a community setting: feasibility in Hispanic women	De Alba et al.	2008	USA	Multi-Methods	- self sampling followed by HPV testing / pap testing by a provider to compare the results of both - survey to assess satisfaction with self sampling	- The aim of the study was (a) to assess sensitivity and specificity of self-sampling in a community setting for identifying high-risk HPV infection and abnormal Pap smear and (b) to assess satisfaction with this collection method among Hispanic women	Newcomer	1213	- Hispanic women ages 18 years who had no Pap smear in the past year	- recruited by lay health workers from Latino Health Access, a community-based organization located in Santa Ana, CA - Recruitment was done through several mechanisms. Indirect methods included referrals from initial subjects, flyers distributed in places frequently visited by Hispanic women, and ads in Spanish local newspapers. Direct methods included personal invitations by lay health workers t…	- Volunteers who met inclusion criteria and signed informed consent were provided with a kit for selfcollection of a vaginal sample for HPV testing. A brief questionnaire to confirm eligibility criteria was administered at this time. Based on lay health workers’ previous experience in this community, the questionnaire did not include sociodemographic items other than age and country of origin due…	Self sampling and physician sampling for HPV	- 1213 performed self sampling - Of the 1,213 who performed unsupervised selfcollection of vaginal samples for HPV testing, 622 had a Pap smear and the first 386 of them had a physician collected cervical sample for HPV retesting	NA	- 33.7% report their satisfaction with overall experience (self sampling) - when participants were asked about the convenience of unsupervised self-sampling compared with physician sampling at a clinic, <2% reported poor or fair convenience of self-sampling	NA	- a positive HPV result does not guarantee that those women will follow-up for further evaluation or treatment at a clinic. - In addition, a negative HPV test in unsupervised selfsampling may prevent or delay seeking medical care for other gynecologic problems	NA
Caitlin	A randomized trial of self-sampling for human papilloma virus among minority immigrant women in need of cervical cancer screening	Kobetz et al.	2018	USA	Multi-Methods	1. A randomized trial to compare the effectiveness two modes of self-sampling delivery - SS +Mail (selfsampling delivered via US mail) versus IP+SS (self-sampling delivered in-person) – for increasing cervical cancer screening uptake among ethnic minority and immigrant women in South Florida 2. Approximately 6 months-post study enrollment, participants were scheduled for a follow-up visit with th…	1. Our primary outcome was self-sampling completion within 6 months of enrollment 2. Secondary outcomes included changes in; 1) cervical cancer knowledge (defined as the proportion of participants answering at least 3 of 5 items about cervical cancer signs and risk factors correctly) 2) the proportion of participants reporting having health insurance; and 3) the proportion of participants reporti…	Newcomer	600 (split between the two groups)	The sample included women who self-identified as Hispanic, Haitian, or non-Hispanic Black, were 30–65 years of age, and reported not having had a Pap smear in the previous 3 years.	Community health workers, who were indigenous to the three target neighborhoods and knowledgeable of cultural mores related to health promotion, recruited and screened women for eligibility at a variety of community venues including churches, flea markets, and community events, such as health fairs. Eligible and interested women were then scheduled for a one-on-one meeting with a community health…		In-person education / kit hand-out OR via the mail	- Six-month follow-up was greater than 70% in both study arms (70.7% in IP+SS, and 71.2% in SS +Mail) and did not significantly differ between study arms. -Completion of HPV self-sampling was high in both study arms, reaching 81.0% (n = 243) among IP+SS participants and 71.6% (n = 214) among SS+Mail participants	- CHEs noted that some women in Little Haiti and South Dade were uncomfortable going to the post office to mail their samples, as this is a government-run facility and there were concerns with immigration status.	- Our high success rate may be attributable to our intervention having been delivered by CHWs, who are members of our target communities and knowledgeable regarding cultural norms. - Within our mailed self-sampling arm, CHWs provided culturally-tailored health education by phone, potentially enhancing HPV self-sampling completion.	Among participants in the SS+Mail arm, cervical cancer knowledge significantly increased from 39.0% of participants answering at least 50% of the questions correctly at baseline to 47.9% at 6-month follow-up. Change in cervical cancer knowledge was not significant among participants in the IP+SS arm. T	- Firstly, we utilized one CHW per community to deliver each intervention to community members. Thus, variation in intervention outcomes between communities may have been due, in part, to variation in intervention delivery between our CHWs. To minimize any potential differences and ensure intervention fidelity, CHWs received extensive training, including formal CHW certification, and underwent mo…	- future research should examine whether mailed HPV self-sampling is a viable screening strategy in other groups that experience cervical cancer disparities. - Future studies should examine not only self-sampling completion but also adherence to follow-up care to further evaluate the effectiveness of this screening intervention	- All study procedures were conducted in the participants’ language of preference, either English, Spanish, or Haitian Creole - Of note, within the IP+SS arm, 42 (14%) women elected to mail their specimens in rather than collect the sample the day of the in-person study visit with the CHW. Most often, these women were menstruating on the day of the in-person study visit and thus elected to self-s…
Caitlin	Assessing the acceptability of self-sampling for HPV among Haitian immigrant women: CBPR in action	Barbee et al.	2010	USA	Qualitative	Recruited 246 eligible women to this study. Participants provided self-collected cervical specimens for HPV testing and answered a series of questions about their experience with self-sampling for HPV.	To determine whether pairing self-sampling for HPV with community health workers (CHWs) is a culturally acceptable method for cervical cancer screening among Haitian immigrant women.	Newcomer	246	21 years of age and older; no prior history of cervical cancer or surgical hysterectomy; no recent Pap smear	The CHWs recruited women primarily through the extensive network of the community-based organization (CBO) where they were formally employed and by canvassing community venues across Little Haiti, including flea markets, health clinics, and Laundromats, to identify women meeting study eligibility criteria. The CHWs approached all women in such venues who appeared to be of Haitian descent and 21 y…	Interviews and self-sampling took place wherever the participant felt most comfortable, usually at her home or the home of a close friend, and were conducted in English or Haitian Kreyol, according to the participant's preference. The CHWs spent an average of one hour with each participant. As previously mentioned, they first explained the study goals to participants and obtained informed consent…	N/A	N/A	women were concerned that they were not sampling from the right place and expressed that they had more confidence in their doctor's ability than their own to get adequate samples for cytology and HPV testing.	When paired with CHWs, who are of Haitian descent and well respected in Little Haiti, selfsampling is a highly acceptable method of cervical screening for Haitian women in this ethnic enclave. The CHWs were trained to participate in research and data collection methods using a standardized manual, created by one of the academic partners, that provides didactic instruction on the logistics of part…	The vast majority of women (97.6%) was comfortable using the self-sampler at home, would recommend this screening method to their friends and/or family members (98.4%), and described the sampler as easy to use (95.1%). Additionally, 97% of all self-collected specimens were deemed adequate for HPV testing.	The questionnaire was short to avoid over-burdening women.	Pairing CHWs with a reliable self-sampling method for cervical screening circumvents critical access barriers in Little Haiti and may also be more congruent with Haitian women's cultural beliefs about gynecological health. While these findings are not generalizable to other immigrant groups in the US, or even Haitian women outside Little Haiti, they are useful for other investigators, similarly c…	Culturally similar CHWs provide value in reaching this immigrant population.
Madi	Cervical cancer screening with clinic-based Pap test versus home HPV test among Somali immigrant women in Minnesota: a pilot randomized controlled trial	Sewali et al.	2015	USA	Multi-Methods	- Using a community-based participatory approach, Somali community health workers (CHWs) were trained by University researchers on the study protocol. The protocol training specifically included information on cervical cancer screening guidelines, randomization and a step-by-step instructional guide on use of the home-based HPV kit - We planned a two-group randomized controlled pilot study of 64 …	- The objective of this pilot study was to examine the difference in successful test completion rates between home-based HPV tests and clinic-based Pap tests among a sample of Somali immigrant women residing in the Minneapolis/St. Paul area, to see if this innovative testing method might improve cervical cancer screening rates in this particular underserved population. - The primary outcome was t…	Newcomer	64 (32 in both groups) - Of the 242 women screened for the study, 75 (31%) were eligible and 11 declined to participate	- This study recruited women of Somali origin, aged 25–70 years, who lived in the US for 10 years or less and who reported not having had a Pap test in the last 3 years.	- The Somali Health Solutions team recruited participants by word of mouth and flyers. - Following the training, all participants at the training completed a survey to determine study eligibility. Participants who were eligible and wanted to participate in the study provided informed consent and medical release forms for their primary care clinics to obtain potential Pap test data	- Prior to assessing eligibility and obtaining informed consent, we held an hour long informational meetings in an informal setting such as at one of the Somali women’s homes or at a community center identified by the Somali Health Solutions staff - Participants were then randomly assigned in a 1:1 ratio to the clinic based Pap test (were asked to follow up with their established clinic for a Pap…	Pap	- Analysis of the primary outcome indicated that participants randomized to the home test group were more likely to complete the test (21/32, 65.6%) than those randomized to the clinic group (6/31, 19.4%); P = 0.0002).	NA	- Women who reported having friends/family members to talk about cancer screening were approximately three times more likely to complete screening than those who do not, although this was not statistically significant after multivariate adjustment	- 83% of these women indicated that if they had to make a choice between using the self- collection and the regular Pap test, they would choose the self-collection method - All participants indicated that the instructions were easy to follow and had no difficulties in collecting the sample - More than 50% of the women reported that they were not at risk for cervical cancer and nearly 50% did not …	- we solely relied on selfreport of Pap test history; this may have created bias if some of the participants were not aware if they had the screening test within the past 3 years.	NA
Madi	Feasibility of Cervical Cancer Screening Utilizing Self-sample Human Papillomavirus Testing Among Mexican Immigrant Women in Harris County, Texas: A Pilot Study	Montealegre et al.	2015	USA	Multi-Methods	- screening questionnaire, educational brochure to review, participants answered a series of questions to assess their initial attitudes toward self-sampling - Results were communicated to participants via telephone 3–5 days after self-sampling. Those who were unreachable by phone were sent their results via certified mail	- Here we describe the acceptability of self-sample HPV testing among a sample of predominantly Mexican immigrant screening non-attendees in Harris County, Texas.	Newcomer	100	- Women were eligible to participate if they approached the study kiosk at the Consulate, were 21 years of age or older, were born outside the USA, reported not currently being pregnant, reported no history of hysterectomy or cervical cancer, and reported not having a Pap test in the past 3 years or more	- Prospective participants were referred to the research project by Ventanilla de Salud staff or recruited through announcements made in the general waiting area at the Consulate.	- At the consulate, they were then given a specimen collection kit and directed to a private restroom	NA	- Among the 18 HR–HPV positive women who received their results, nine (50 %) obtained a Pap test within three months of self-sampling.	- Among our participants, the primary barrier to follow-up was difficulty obtaining public healthcare coverage	- After selfsampling, most participants reported that the instructions were easy to understand (98 %) and that the self-sampler was easy to use (83 %). W	- Participants’ primary concern prior to self-sampling was fear of injury (32 %), followed by concerns that the test may not be safe (30 %) and concerns that the broom may not be clean (27 %).	- small sample size - given the public healthcare resources available to immigrants (both documented and undocumented) through the Harris County program, our results may not be generalizable to other areas of the country that do not have a similar program		- Accessed through U of C library - our data that suggest that women’s preference toward self-sampling may be related to its improved convenience and privacy over Pap testing
Madi	Empowering Low-Income Asian American Women to Conduct Human Papillomavirus Self-Sampling Test: A Community-Engaged and Culturally Tailored Intervention	Ma et al.	2022	USA	Multi-Methods	- We designed a culturally tailored intervention about the HPV self-sampling test and implemented the intervention in Asian American communities in the greater Philadelphia metropolitan area and in New York City - We also measured participants’ HPV-related knowledge, awareness of and attitude toward HPV self-sampling tests, perceived social support, and self-efficacy related to the HPV self-sampl…	- The goal of this study is to evaluate our culturally tailored intervention on HPV self-sampling test uptake.	Newcomer	156	- Participants were eligible for our study if they: (1) self-identified as Chinese, Vietnamese, or Korean; (2) were biologically female and between ages 30 and 55;	- We recruited participants through community-based organizations and faith-based organizations in 3 ethnicities: Chinese, Korean, and Vietnamese Americans. We first designed flyers in English, Chinese, Korean, and Vietnamese, in which we described the study goal, participant eligibility, and time and location for the intervention; flyers were distributed at community-based and faith-based organi…	The intervention consisted of 4 components: 1. address individual-level barriers, such as lack of awareness or knowledge among community members, we conducted group education workshops at local community-based and faith-based organizations. 2. the bilingual health educators provided written and illustrated instructions detailing how to perform the selfsampling test in Chinese, Korean, and Vietnam…	NA	- We examined the HPV self-sampling test update and found that all 156 (100%) participants completed the self-sampling test. The sample specimen from 2 out of the 56 (3.57%) Chinese participants and 9 out of the 50 (18%) Vietnamese participants did not contain any fluid, preventing testing for HPV DNA. Thus, in total, 92.95% of the participants provided satisfactory samples for testing.	NA	- However, more than half of participants (57.2%) reported having a physician that they visit regularly.	- The HPV-related knowledge score saw the greatest change from baseline - At post-intervention assessment, 74% of participants said that they were “confident” or “very confident” in their ability to conduct the self-sampled HPV test - participants had increased knowledge, perceived social support, self-efficacy, and comfort at post-intervention assessment	- We did not include a control group in this study, hence our inability to demonstrate that the positive changes in outcomes were entirely due to the effects of the intervention components		- During these educational workshops, our bilingual community health educators gave a presentation on HPV symptoms and transmission, CC risk factors, and early detection strategies and testing to participants. The participants also received individual handouts on HPVand CC prevention to take home or share with friends and family members - In developing the culturally tailored intervention, we use…

## Sheet: RuralRemote
Assigned to:	Title	Authors	Year	Country	Study Design	Methods	Objectives / Intended Outcomes	Priority Population	Sample Size (n=?)	Population details (age, location, group, inclusion criteria etc.)	Participant recruitment / identification	Intervention (physician provided/mail-in/etc.) + study arms (n=?)	Comparator	Outcome: Uptake/Rates	Outcome: Barriers	Outcome: Facilitators	Outcome: Knowledge / Attitudes	Sources of Bias (limitations, etc.)	Recommendations / Next Steps	Other considerations
Madi	Randomized Intervention of Self-Collected Sampling for Human Papillomavirus Testing in Under-Screened Rural Women: Uptake of Screening and Acceptability	Racey et al.	2016	Canada	Mixed Methods	- This study was conducted in consultation with the local family health team (FHT), who are the sole primary care providers for the entire region, servicing *12,000 patients. The FHT comprised six general practitioners and three nurse practitioners. - Women were randomized to one of three interventions: (1) an at-home self-collected HPV kit, (2) an invitation for Pap testing, or (3) standard of c…	- The primary objective of this study was to determine if cervical cancer screening uptake would increase among underscreened women living in rural Ontario, Canada, if at-home self-collected sampling for HPV testing was offered as a primary cervical cancer screening modality, compared to an invitation for Pap cytology testing or no intervention	Rural/Remote	818 women were included in the study: 335 received a HPV self-collection kit, 331 received a reminder letter, and 152 received the standard of care	- under-screened women 30–70 years of age	- The Clinic identified under-screened women through their electronic medical record (EMR) system.	- HPV self-collected test arm. Women in the HPV test arm received a study information letter from the health clinic 2 weeks before receiving the at-home self-collected HPV kit. The letter informed women about the study and provided them the option to opt-out. - Invitation for Pap testing arm. Women in the Pap testing arm were sent an invitation letter for Pap testing that asked women to call thei…	Three way comparison - pap, self sample, control	- In the HPV self-sampling arm, 21% (70/335) returned the self-collected samples and questionnaire and 11% (37/335) opted to undergo Pap testing at the clinic such that in total, 32% were screened after receiving a self-collected HPV kit. Over 60% of the women (43/70) returned the self-collected HPV kit in the first month. - In the Pap test arm, 15.4% (51/331) accepted the invitation for Pap test…	NA	- Eighty-eight percent responded that they would recommend HPV testing to a family member or friend, and 90% said they would be likely to use self-collected HPV testing in the future - The mean acceptability score was 92.6% (SD = 1.5), among the 70 women who elected to undergo selfcollected sampling. - The majority of women (89.7%) who completed the questionnaire found self-collected sampling for…	NA	- A limitation was that we only measured acceptability among women who completed a test, limiting our ability to generalize findings. - There was a change to the protocol for follow-up phone calls to women in the Pap testing arm during the study. Only 20% of the women in the Pap invitation arm received a followup phone call due to a shortage of clinical resources.	NA	- Accessed through U of C library
Madi	Assessing the impact of mailing self-sampling kits for human papillomavirus testing to unscreened non-responder women in Manitoba	Jalili et al.	2019	Canada	Mixed Methods	- Each study arm was stratified by area of residence to ensure that approximately half the participants resided in urban areas and half resided in rural areas of Manitoba.	- The purpose of the present study was to comparemcervical cancer screening participation in unscreened non-responder women in Manitoba who were mailed and not mailed a self-sampling kit for hpv	Rural/Remote	529 (intervention group - 261 rural), 523 (control group)	- Unscreened women were those who had no record of a Pap test in the CervixCheck registry in Manitoba and who had been registered for a minimum of 5 years. - Non-responders were women who had been sent an invitation letter to be screened, but who remained unscreened. - 30 and 65 years of age	- CervixCheck registry,	- Women in the intervention group were mailed a selfsampling kit for hpv through Canada Post. The control group received no additional communication from CervixCheck, per current program operations. Both study groups were followed for a period of 6 months to determine screening participation. The 6-month follow-up period was selected so as to compare outcomes with outcomes from a previous study t…	Pap	- By the end of the 6-month study period, 51 women (27 lived in a rural area) in the intervention group (9.6%) had completed an hpv test; 6 (1.1%) had completed a Pap test; 16 (3.0%) had declined participation; and 456 (86.2%) had not responded or participated in screening - Area of residence (rural vs. urban) and age were not significant predictors of screening participation	NA	NA	NA	- The main limitation of the study is that it did not address how varied implementation strategies might affect screening participation by unscreened women who are offered an hpv self-sampling kit. For example, how factors other than the hpv self-sampling device itself might have affected screening participation is unknown	- our future research will examine the effect of an opt-out letter notifying women that they are overdue for cervical cancer screening, that CervixCheck will be mailing them an hpv self-sampling kit, and that they should notify the program, if they do not wish to participate; and the impact of partnering with a community health clinic or nursing station to provide an hpv self-sampling kit that wo…	- invitation letter with a translated phrase on the reverse that appeared in 21 languages (giving a contact number to review the information with a service provider and an interpreter), - compared to toher canadian studies: We expected that the screening participation in our study would be lower than in other studies because the intervention group in our study included only unscreened non-respond…
Madi	Effect of vaginal self-sampling on cervical cancer screening rates: a community-based study in Newfoundland	Duke et al.	2015	Canada	Multi-Methods	- we devised a communitybased study in rural areas of Newfoundland and Labrador (NL), Canada, to determine whether offering selfcollected HPV testing might be an effective tool to increase cervical cancer screening participation - post eval survey was used	- Our objective was to determine if the introduction of a selfcollection strategy for HPV screening would increase primary cervical cancer screening in a community-based setting in rural NL.	Rural/Remote	A (1760), B (2761), C (1536)	- 30–69 years	- community-based cohort design (Kits were available at public locations such as the hospital, pharmacies, hair salons and women’s exercise centers. The research nurse was also available to drop off kits at a woman’s home or work.)	- The two intervention communities (Communities A and B) were rural communities of similar size and demographic composition with the presence of academic faculty members to oversee the research. The control community was selected because it was demographically similar to the two study communities - Potential participants living in Community A were given the option of being screened for HPV infect…	A - self sampling plus education, B - pap plus education, C - control (no education, only pap)	- 837 HPV self-collection kits were taken from the distribution sites in Community A during 2010 and 2011, and 168 (20.1 %) of these were returned for processing - The overall response rate of eligible women to self-collection in Community A was 9.5 % (168/1760) - In Community B, 374 (13.5 %) women presenting for Pap smears agreed to be part of the study and provided information on themselves and…	NA	NA	- The telephone survey assessing the penetration of the educational and promotional campaigns indicated that well over half of the eligible women in Community A (167/276, 74.6 %) and just under a third of eligible women in Community B (117/381, 30.7 %) were aware of the cervical cancer research study in their area - Overall, participant satisfaction with the kits was high, with 114 (67.9 %) parti…	- Selfsampling is fast, women are overwhelmingly able to collect adequate samples, and it can be implemented in communities that have no or very few regular primary care providers. However, our study makes clear the fact that simply providing kits may not sufficiently encourage women to self-collect, and further study of more targeted or direct distribution methods is warranted prior to wider use…		- The research nurse in Communities A and B gave presentations on cervical cancer screening to various community groups as part of an educational campaign. - we also learned of a nurse practitioner and a young family physician in Community C who both began practicing in the community immediately prior to and during the study period, both of whom were proactive with cervical cancer screening.
Madi	HPV self-sampling in cervical cancer screening: the effect of different invitation strategies in various socioeconomic groups - a randomized controlled trial	Tranberg et al.	2018	Denmark	Quantitative	- eligible participants were allocated into one of three study arms - Participation in the CHOiCE trial was defined as returning a self-sample or attending regular cytology screening at the GP within 180 days after receiving the second reminder.	- The aims were to assess if HPV self-sampling has an effect on screening participation among all socioeconomic groups of non-participants, and if the two invitation strategies for offering self-sampling influence the participation rate equally	Rural/Remote + newcomer	- 9,791 women due to receiving a second reminder were randomized into three groups	- 30–64 years who were due to receive the second reminder from the Central Denmark Region - urban, semi urban and rural area codes were recruited - rural area (thinly populated area: more than 50% of the population lives in rural grid cells) - western and non western immigrants	- registry data from nationwide registries applied to data from a population-based randomized controlled effectiveness trial (Cervical HOme-based CancEr screening [CHOiCE])	- The women were either 1) mailed a self-sampling kit directly to their home addresses (directly mailed group); 2) mailed an invitation to order the kit by e-mail, text message, phone, or via a website (opt-in group); or 3) mailed the standard second reminder to attend regular cytology screening (control group).	Three way comparison between opt-in, opt-out and pap (control)	Opt-out vs control - western immigrants = 18.1% greater participation - non western immigrants = 13.4% greater - rural = 12.3% greater -Compared with the control group, the greatest differences in participation by mailing the kit directly were found for Western immigrants Opt-in vs control - western immigrants = -0.2% less participation - non western immigrants = 2.5% greater - rural = 5.7% great…	NA	- across all socioeconomic groups, mailing the self-sampling kit directly to women yielded a higher screening participation than a standard second reminder to attend regular cytology screening	NA	NA	NA	NA
Caitlin	Self-collected cervicovaginal sampling for site-of-care primary HPV-based cervical cancer screening: a pilot study in a rural underserved Greek population	Chatzistamitou et al.	2017	Greece	Mixed Methods	women provided self-collected cervicovaginal sample along with a study questionnaire	To test the feasibility of asite-of-care cervicovaginal self-sampling methodology forHPV-based screening in an underserved rural female Greek population.	Rural/Remote	346	women residing rural areas of Northern Greece	women residing rural areas of Northern Greece were invited, via a public announcement from the local authorities,to visit local primary health care units at a particular date,where midwives provided information on benefits ofself-sampling for cervical cancer screening and the studyrationale.	100% (n=346) of women agreed to participate. They received a self-sampling kit along with the necessary instructions provided by the manufacturer. Atthat time and place, they privately collected the specimen–alone or with midwife supervision–and then gave it to thehealthcare professional. Following that, the participant filled-in a questionnaire specifically designed in order to allow conclusions…	N/A	All recruited women participated in screening (100%, n=346)	The majority of women (214/346, 61.8%), whoreported negligence as the reason for not being tested, char-acterised self-sampling as comfortable (chi-squared 10.016,p¼.040) and would rather prefer self-sampling in the futureas a method of choice (chi-squared¼8.422,p¼.015). Womenwho characterised pelvic exam as uncomfortable (57/346,16.5%), found self-sampling less easy and less comfortable.	Most women reported non-difficulty and non-discomfort in self-sampling (77.6% and 82.4%, respectively). Women of the younger age group (<44 years) describedself-sampling as ‘very easy’.	When asked about the experience of the self-samplingmethod and their acceptance, women preferred by far self-sampling to the clinician-aided method and reported thatshould self-sampling being available, they would test them-selves more regularly	a limitation and possible source of bias would bethe high dropout rate (22%) of women requiring colposcopy,due to various reasons. Since the present pilot study, though,is not a diagnostic accuracy study this would not affect theobjectives, i.e. the feasibility and acceptance of the overallprocess.
Caitlin	Implementation of HPV-based Cervical Cancer Screening Combined with Self-sampling Using a Midwifery Network Across Rural Greece: The GRECOSELF Study	Agorastos et al.	2019	Greece	Quantitative	Women residing in remote areas of Greece were approached by midwives, of a nationwide network, and were provided with a self-collection kit (dry swab) for cervicovaginal sampling and asked to answer a questionnaire about their cervical cancer screening history. Samples were laboratory analyzed for hrHPV.	The main objective of the GRECOSELF study was to explore the implementation of self-sampling combined with hrHPV DNA testing in Greece, utilizing a nationwide midwifery network to approach women residing in remote rural areas of the country who consequently do not have regular access to cervical cancer screening	Rural/Remote	13111	nonpregnant women between 25 and 60 years old who resided in rural areas of Greece. The mean age was 44.4 and the majority of the recruited women were premenopausal (69.3%) and unvaccinated (97.2%) against HPV. Residing in remote area of greece.	Eligible participants were approached by midwives through public announcement in their place of residence. In GRECOSELF, we used a network of midwives, working in public health care, who cover most of the rural areas of the country, to serve as providers for self-sampling devices. The model was a combination of a community campaign at the village level, involving local authorities, and a door-to-…	Participants were provided with a dry swab (Roche Molecular Systems) along with the necessary sampling instructions. Each participant privately collected the cervicovaginal specimen on the dry swab, either alone or under midwife supervision, mainly in a primary health care facility (Health center, General Practitioner's office) or at home; the woman inserted the swab in the vagina, and rotated it…	N/A	Overall, of the 13,111 samples tested, 267 (2.0%) yielded an invalid HPV result; therefore, 12,844 women with a valid HPV result were included in the analysis. Of these, 11,774 tested hrHPV negative and 1,070 (8.3%) women tested positive for at least one hrHPV type. A total of 148 of the 1,070 (13.8%) tested positive for HPV16 only and 41/1,070 (3.8%) for HPV18 only. A total of 773 of the 1,070 (…	N/A	Regarding Greece and according to the results presented herein the midwifery network suggested by GRECOSELF is a promising means of increasing screening coverage, given the geography of the country as well as the already established primary health care setting.	N/A	Limitations of the study are, first, the fact that, due to various reasons, not all hrHPV-positive women detected during the study accepted to undergo colposcopy; and, second, that cervical cancer screening history information was provided by the women themselves rather than documented reports, mainly due to the lack of registry infrastructure in Greece. Missing information regarding cervical can…
Caitlin	The effect of self-sampled HPV testing on participation in cervical cancer screening on a remote island	Yamasaki et al.	2019	Japan	Quantitative	Participants were mailed a self sample kit or a regular recall for screening and participation rates were analyzed across groups.	The purpose of this study was to assess the effect of HPV self-sampling devices among non-attenders.	Rural/Remote	249	non-attenders who were scheduled for participation in the cervical cancer screening program; women aged 20 and 49	2,986 non-attenders who missed the last round of cervical screening were identified with the assistance of the Goto city government. At first, we sent all of 2,986 non-attenders two kinds of letters; one is a letter to attend regular cytology screenings as the first-call, and the other is a letter requesting their written consent for participation in this study using a HPV self-sampling device.	HPV self-sampling devices were sent by mail to the n=125 non-attenders in the self-sampling group. The devices were sent along with pictorial instructions and a pre-paid return envelope. Women in the self-sampling group received letters with the results of their HPV test and scheduled appointments with a medical institution for cytology. The womenʼs gynecologists were informed about the study and…	Re-call for regular pap smear cytology screenings. The n=124 women in the “recall” group were invited by letter to attend regular cytology screenings. Cervical cytology was conducted by smear method, and all results of the cytological findings were read by the same screener at Goto City Hospital	A total of 95 of the 125 cases in the self-sampling group participated in cervical cancer screening and/or returned the self-sampling device. The overall rate of participation in cervical cancer screening and/or returning the self-sampling device was 76.00%. A total of 15 of the 124 cases in the “recall” group participated in cervical cancer screening. The overall cervical cancer screening partic…	N/A	Sending simple pictorial instructions on how to obtain the self-sampled specimen and return the self-sampling device proved sufficient for HPV testing in all 94 cases where the HPV self-sampling devices were returned, and there were no adverse events	N/A	N/A	offering HPV self-sampling devices to nonattenders may improve screening coverage and acceptability in remote areas where there is a lack of medical services. In this study, we were able to identify CIS patients among nonattenders by offering HPV self-sampling devices.	N/A
Caitlin	Community-Based Screening for Cervical Cancer: A Feasibility Study of Rural Appalachian Women	Crosby et al.	2015	USA	Multi-Methods	400 women were recruited from eight rural Appalachian counties, in 2013 and 2014. After completing a survey, women were provided instructions for self-collecting a cervico-vaginal swab. Specimens were tested for 13 oncogenic HPV types. Simultaneously, women were notified of their test results and offered initial navigation for Pap testing. Chart-verified Pap testing within the next six months ser…	To describe women’s comfort levels and perceptions about their experience self-collecting cervico-vaginal swabs for HPV testing; to determine whether nurse-guided patient navigation increases the odds of women receiving a traditional Pap test after HPV screening; and to test the hypothesis that women testing positive for oncogenic HPV would be more likely to have a subsequent Pap test than those …	Rural/Remote	400	Average age of the sample was 40.2 years. 1) being between 30–65 years of age, 2) reporting not having a Pap test in the past three years, and 3) reporting not currently being pregnant, 4) reporting never testing positive for HPV, 5) reporting sexual activity in the past 12 months.	Recruitment occurred in eight economically distressed counties (as designated by the Appalachian Regional Commission) of rural Appalachian Kentucky. Recruitment flyers were posted in all seven of the regionalized local health departments comprising the district. Women were also recruited personally at community outreach events and non-traditional healthcare settings (e.g., mental health and subst…	a research assistant read aloud a specimen collection instruction sheet, before providing a hard copy to each woman. Women took the instructions into a public or private restroom (depending upon recruitment venue). After self-collecting, women then swirled the collection brush 40 times in a specimen vial containing Preservecyt®, a fixing solution. They then sealed the specimen vial, placed it in …	N/A	Because the consent process included the point that women would be asked to self-collect a cervico-vaginal swab, the study was not designed to describe or quantify the refusal to self-collect.	About 18% (18.5) reported experiencing some pain during the collection process, and 10.5% reported bleeding during the collection process.	Comfort levels with self-collection were high: 89.2% indicated they would be more likely to self-collect a specimen for testing, on a regular basis, compared to Pap testing. Thirty women (7.5%) had a follow-up Pap test.	With some exceptions, women were physically comfortable with the process for self-collecting cervico-vaginal swabs for HPV testing and 89% preferred this method of screening over traditional, clinic-based Pap testing.	Findings are limited by the use of a convenience sample. Also, the study design could not determine whether motivational issues or access issues operated to preclude Pap testing. For instance, women may have been motivated to have a Pap test as a consequence of being tested for HPV, but they may have perceived a lack of access to these services (despite our navigation attempts). In addition, our …	Further, efforts to re-contact women who have received an oncogenic HPV test result and an initial navigation contact may not be useful. Finally, testing positive for oncogenic HPV may not be a motivational factor for subsequent Pap testing.	in responding to a question asking for level of agreement regarding whether women would have a Pap test or colposcopy “if my HPV test is positive”, 55.9% selected the response option of “strongly agree”, with 26.6% selecting “agree,” 8.5% selecting “slightly agree,” and the remainder selecting a level of disagreement.
Caitlin	Self-collected vaginal swabs for HPV screening: An exploratory study of rural Black Mississippi women	Crosby et al.	2017	USA	Multi-Methods	Eighty-eight women were recruited from two churches located in different towns of the Mississippi Delta. After completing a survey, women were provided instructions for self-collecting a cervico-vaginal swab and completing a post-collection survey. Specimens were tested for 13 oncogenic HPV types.	To determine the post-procedure acceptability of self-collecting a vaginal swab for HPV testing among a highly impoverished and geographically isolated population of medically underserved Black women residing in the Mississippi Delta. Further, to test correlates of reporting that self-collection is preferred over Pap testing. Finally, to determine the prevalence of any of 13 high-risk HPV types a…	Rural/Remote	88	1) being 30–65 years old, 2) not having a Pap test in the past three years, 3) not currently pregnant, 4) never testing HPV-positive, and 5) sexual activity in the past 12 months. Average age 46.5 years.	Two churches located in different towns of the Mississippi Delta served as recruitment sites. Two female research assistants obtained permission and support from church ministers to recruit women after Sunday services. As opposed to the research assistants approaching women, women were told to find and talk with the research assistant after services to learn about the study. Because print informa…	Research assistant read aloud a specimen collection instruction sheet, before providing a hard copy. Women took the instructions into church restrooms. The instructions included an illustration showing the insertion of the swab into the vagina and the rotating motion of the swab to collect an adequate specimen. After self-collecting, women then swirled the collection brush 40 times in a specimen …	N/A	Because the consent process included the point that women would be asked to self-collect a cervico-vaginal swab, the study was not designed to describe or quantify the refusal to self-collect.	17% reporting some pain during self-collection were less likely to express this preference was not surprising, but it does suggest that practice-based programs using self-collection should provide instructions to women such that any pain in self-collection is minimal		When asked “how comfortable were you with collecting the specimen,” 35.2% selected the option of “comfortable,” 19.3% selected “somewhat comfortable,” 22.7% selected “slightly comfortable,” 13.0% selected “neither comfortable nor uncomfortable,” and 8.0% selected “uncomfortable.” Seventeen percent reported experiencing some pain during the collection process, and 12.5% reported bleeding during th…	1) Findings are limited by the use of a convenience sample and by the validity of the self-reported data. 2) limited by the very small sample size and the corresponding lack of statistical power. 3) the compensation provided to women for completing the assessment may have motivated them to agree to self-collection thus whether similar results would occur in the absence of this compensation is not…	That women self-collected in their church is an important finding in this regard as it suggests that such programs could be faith-based. Black rural women from the Deep South are generally comfortable self-collecting cervico-vaginal swabs for HPV testing. Given that nearly 30% tested positive for oncogenic HPV, the utility of this screening method appears feasible and practical. Future studies sh…	it is noteworthy that the percent relative difference in mean scores for the scale measure of trust in doctors was 11.5, indicating that women lacking this trust are potentially more likely to prefer self-collection over Pap testing. That women with recent multiple male sex partners were less likely to express this preference may be a consequence of their greater presumed risk and thus their sens…
Madi	Self-collecting a cervico-vaginal specimen for cervical cancer screening: an exploratory study of acceptability among medically underserved women in rural Appalachia	Vanderpool et al.	2014	USA	Mixed Methods	- Survey prior to self-collection - self collection at the primary care clinic - follow-up interviews two months post-results notification with all study participants to answer any additional questions about their results, inquire about whether or not they discussed their HPV test results with friends, family members, and/or sex partner(s), and ascertain whether or not a subsequent Pap test appoi…	- The purpose of this exploratory study was to determine whether Appalachian Kentucky women would be amenable to self-collecting a cervico-vaginal specimen for HPV testing. - A secondary purpose of the study was to implement and track the results of a patient counseling and navigation intervention promoting guideline-recommended cervical cancer Pap smear screening among all women participating in…	Rural/Remote	31	- Women were eligible to be in the study if they were between the ages of 30 and 64, were not pregnant, reported not having a Pap test in the past four years, and had never tested positive for HPV infection.	- Recruitment took place at a free primary care clinic in southeastern Kentucky - A study nurse recruited potential study participants at the clinic on six separate days	- women completed a brief, self-administered questionnaire (Each participant received a $25 gift card at the time of interview as compensation for their time) - Women were verbally instructed by the nurse on the correct method for self-collecting a cervico-vaginal specimen. In addition, participants were given a graphic-based instruction sheet for use in the clinic restroom during the self-collec…	NA	- None of the women approached for participation declined, and all successfully completed the self-collected cervico-vaginal brush, indicating a 100% acceptance rate of this new high-risk HPV screening method	- Thirty percent of the sample indicated that they had minimal trust in doctors and the healthcare system, and that they did not have time to see a gynecologist.	NA	- Almost 90% of the women knew that cervical cancer is caused by HPV. - Forty percent of the women were “very afraid” of developing cervical cancer	- Small sample size and use of a convenience sample. - There is also the possibility for selection bias as study participants were already seeking services at a healthcare clinic and may be more proactive in accepting cervical cancer screening. - The study design also did not allow for a comparison of acceptance rates with women who were guidelinecompliant with cervical cancer screening	- our study tested a two-stage process – self-collection for HPV testing, followed by patient navigation to clinical services – which focused on eliminating barriers to cervical cancer screening among an at-risk population of women in a medically underserved, rural region of Kentucky	- all 26 women testing negative for high-risk HPV declined nurse-assisted navigation to follow-up Pap testing. - In contrast, four of the five women testing positive for high-risk HPV accepted navigation to the local health department for follow-up Pap testing - Even though all of the women testing negative for high-risk HPV initially declined navigation to Pap testing, at the two-month follow-up…

## Sheet: Summary
Study Design	Quantitative	Qualitative	Mixed	Multi
Indigenous	3	2	0	2	7
Newcomer	0	1	2	6	9
Rural/Remote	0	3	4	3	10
Total	3	6	6	11	26
Countries	Canada	Australia	New Zealand	USA	Greece	Japan	Denmark
Indigenous	2	1	4	0	0	0	0
Newcomer	1	0	0	8	0	0	0
Rural/Remote	3	0	0	3	2	1	1
Total	6	1	4	11	2	1	1	26
Study Population	(n=?)
Indigenous	5632
Newcomer	3292
Rural/Remote	31943
Total	40867
